# Supplementary material for: Learning sequence to predict gain- or loss-of-function variants
Source: Research Square preprint supplement (doi:10.21203/rs.3.rs-6705195/v1), 2025-06-06
Supplement: Supplementary file 1 [file 0bd9451b1fc9cb945d944b05.xlsx]

## Sheet: Supplementary Table 1
GeneName	GOF_variant_number	LOF_variant_number	All_variant_number
AAAS	0	3	3
AARS	0	6	6
ABCA3	0	3	3
ABCB4	0	1	1
ABCB7	0	1	1
ABCC2	0	2	2
ABCC6	0	24	24
ABCC8	7	38	45
ABCC9	1	0	1
ABCD1	0	1	1
ACADM	0	6	6
ACADS	13	0	13
ACP5	0	1	1
ACTA1	1	0	1
ACTB	11	1	12
ACVRL1	0	5	5
ACY1	0	1	1
ADA	0	2	2
ADA2	0	10	10
ADAM22	0	1	1
ADAMTS13	0	2	2
ADCY5	1	0	1
ADD3	0	1	1
ADGRG1	0	5	5
AFF2	0	1	1
AFF4	3	0	3
AFG3L2	0	2	2
AGK	0	1	1
AGPAT2	0	2	2
AGXT	0	13	13
AHI1	0	1	1
AICDA	0	1	1
AIP	0	1	1
AIRE	0	3	3
ALAS2	0	3	3
ALDH18A1	0	2	2
ALDH1A2	0	1	1
ALDH7A1	0	1	1
ALK	3	0	3
ALOX12B	0	2	2
ALPL	0	19	19
ALX3	0	4	4
ALX4	2	2	4
AMT	0	3	3
ANG	0	14	14
ANGPTL3	0	7	7
ANGPTL4	0	7	7
ANGPTL5	0	1	1
ANKH	0	2	2
ANKRD1	3	1	4
ANO5	1	3	4
ANOS1	0	7	7
ANTXR2	0	5	5
AP2S1	0	3	3
AP4B1	0	1	1
AP4E1	0	2	2
APOA1	1	0	1
APOA5	0	1	1
APOC3	1	1	2
APOE	0	1	1
APPL1	0	1	1
APTX	0	1	1
AQP2	0	4	4
AR	0	1	1
ARSB	0	1	1
ARX	0	11	11
ASL	0	14	14
ASNS	0	4	4
ASPA	0	15	15
ATP13A2	0	3	3
ATP1A2	0	17	17
ATP1A3	0	3	3
ATP2A2	0	1	1
ATP6V0A2	0	5	5
ATP6V1B1	0	2	2
ATP6V1B2	1	0	1
ATP7A	0	2	2
AVPR2	2	26	28
B3GALT6	0	10	10
BAG3	1	1	2
BAP1	0	1	1
BBS10	0	2	2
BCHE	0	4	4
BCKDHA	0	8	8
BCKDHB	0	4	4
BCO1	0	1	1
BCOR	0	1	1
BCS1L	0	1	1
BEST1	0	7	7
BMPR1B	0	2	2
BMPR2	0	6	6
BRAF	10	2	12
BRCA1	0	59	59
BSCL2	0	1	1
BSND	0	5	5
C12orf57	0	1	1
C19orf12	0	6	6
C3	9	1	10
C7	0	1	1
CA4	2	0	2
CACNA1F	1	0	1
CACNB2	0	3	3
CADM1	2	0	2
CANT1	0	5	5
CAPN1	0	1	1
CAPN3	0	2	2
CAPN5	1	0	1
CARD11	3	0	3
CARD14	6	0	6
CARD9	0	1	1
CASK	0	2	2
CASR	7	58	65
CAV3	6	0	6
CAVIN4	0	4	4
CBLB	0	5	5
CBS	0	2	2
CC2D2A	0	4	4
CCBE1	0	1	1
CCDC114	0	1	1
CCM2	0	1	1
CCN6	0	1	1
CDC73	0	2	2
CDH1	0	2	2
CDKN1B	0	1	1
CDKN1C	6	0	6
CDKN2A	0	22	22
CDKN2B	0	2	2
CDON	0	1	1
CETP	0	1	1
CFAP53	0	1	1
CFB	15	0	15
CFC1	0	4	4
CFI	0	1	1
CFTR	1	11	12
CHAT	0	1	1
CHCHD10	0	2	2
CHEK2	0	2	2
CHM	0	3	3
CHMP4B	2	0	2
CHN1	9	0	9
CHRNB1	2	0	2
CHRNB2	3	0	3
CHRND	2	0	2
CHRNE	1	0	1
CHST14	0	8	8
CHST6	0	13	13
CHSY1	0	2	2
CIB2	0	3	3
CKAP2L	0	1	1
CLCN1	0	15	15
CLCN2	0	3	3
CLCN5	0	18	18
CLCN7	0	8	8
CLCNKB	0	17	17
CLDN16	0	3	3
CLMP	0	2	2
CLN6	0	2	2
CLPB	0	10	10
CLTC	0	1	1
CNGA3	0	40	40
CNGB3	5	0	5
CNNM2	0	4	4
CNTN3	0	1	1
CNTNAP1	0	1	1
CNTNAP2	0	1	1
CNTNAP3	0	1	1
CNTNAP5	0	1	1
COG6	0	1	1
COL11A1	0	2	2
COL17A1	1	0	1
COL1A1	0	1	1
COL2A1	0	7	7
COL4A3	0	3	3
COL6A2	0	1	1
CP	0	7	7
CPT1A	0	1	1
CPT2	0	2	2
CRB1	0	3	3
CRB2	0	7	7
CRPPA	0	4	4
CRTAP	0	1	1
CRYAB	1	0	1
CSF1R	0	4	4
CSF3R	0	1	1
CSTB	0	2	2
CTNND2	0	6	6
CTRC	0	1	1
CTSC	0	14	14
CTSK	0	1	1
CUL3	0	2	2
CUL4B	0	2	2
CYP11A1	0	2	2
CYP11B1	0	1	1
CYP17A1	0	5	5
CYP19A1	0	7	7
CYP1B1	0	12	12
CYP21A2	0	88	88
CYP24A1	0	17	17
CYP26C1	0	1	1
CYP27A1	0	1	1
CYP27B1	0	5	5
CYP2D6	0	1	1
CYP2U1	0	1	1
CYP4V2	0	3	3
CYP7B1	0	1	1
DACT1	0	4	4
DBT	0	3	3
DCLRE1C	0	19	19
DDR2	0	4	4
DDX24	0	1	1
DDX3X	0	7	7
DEAF1	0	1	1
DEPDC5	0	1	1
DGUOK	0	1	1
DICER1	0	3	3
DLL4	0	7	7
DLX3	0	3	3
DNAAF1	0	2	2
DNAAF3	0	1	1
DNAI1	0	1	1
DNASE1	0	2	2
DNM2	8	0	8
DNMT3B	0	2	2
DPP6	0	1	1
DPYD	0	1	1
DSC2	0	1	1
DSPP	0	1	1
DUOX2	0	6	6
DUOXA2	0	1	1
DYM	0	1	1
DYRK1A	0	1	1
DYRK1B	2	0	2
ECE1	0	1	1
EDA	0	5	5
EDNRA	2	0	2
EDNRB	0	2	2
EFNB1	0	17	17
EFTUD2	0	4	4
EGFR	0	1	1
EHMT1	0	1	1
EIF2B2	0	1	1
EIF2B5	0	3	3
EMD	0	4	4
ENG	0	23	23
ENPP1	0	9	9
EPAS1	4	0	4
EPB41L1	0	1	1
EPHA4	0	1	1
EPM2A	4	4	8
ERBIN	0	1	1
ERCC3	0	1	1
ESR1	0	1	1
ETHE1	0	2	2
EXT1	0	8	8
EXT2	0	2	2
EYA1	0	16	16
F12	1	0	1
F2	1	0	1
F7	0	2	2
F9	1	0	1
FAM111B	2	0	2
FAM20A	0	1	1
FAS	0	1	1
FBXL4	0	1	1
FEZF1	0	1	1
FGB	0	1	1
FGF10	0	1	1
FGF12	1	0	1
FGF8	0	3	3
FGFR1	0	17	17
FGFR2	4	0	4
FGFR3	7	1	8
FH	0	4	4
FIG4	0	1	1
FKTN	0	2	2
FLCN	0	2	2
FMO3	0	5	5
FMR1	0	1	1
FOXC2	0	1	1
FOXE1	0	3	3
FOXE3	0	3	3
FOXH1	0	1	1
FOXL2	0	17	17
FOXP3	0	4	4
FOXRED1	0	2	2
FTO	0	3	3
FTSJ1	0	1	1
FUS	0	2	2
FXN	0	10	10
G6PC3	1	1	2
GAA	0	4	4
GABRA1	0	2	2
GABRB3	0	1	1
GABRG2	0	2	2
GALC	0	2	2
GALNS	0	1	1
GALNT2	0	1	1
GALT	0	2	2
GAN	0	3	3
GARS	0	5	5
GATA2	0	1	1
GATA4	0	12	12
GATA5	0	9	9
GATA6	0	4	4
GBA	0	3	3
GBA2	0	1	1
GCH1	0	6	6
GCK	0	7	7
GCM2	0	2	2
GDF1	0	7	7
GDF5	6	3	9
GDF6	1	0	1
GDNF	0	4	4
GHSR	0	3	3
GJA1	3	8	11
GJA5	0	1	1
GJA8	0	3	3
GJB1	3	19	22
GJB2	5	14	19
GJB6	1	3	4
GJC2	0	7	7
GLA	0	379	379
GLDC	0	6	6
GLI2	0	1	1
GLI3	0	3	3
GLP1R	0	1	1
GLRA1	0	1	1
GLUD1	3	0	3
GMPPA	0	1	1
GNA11	2	0	2
GNAO1	0	1	1
GNAS	0	3	3
GNB1	8	0	8
GNE	0	8	8
GNPTAB	0	3	3
GNRHR	0	18	18
GORAB	0	1	1
GOSR2	0	1	1
GPC3	0	2	2
GPD1L	0	3	3
GPIHBP1	0	2	2
GPR143	0	2	2
GRHL3	0	1	1
GRIA1	0	1	1
GRIA3	0	2	2
GRIN2A	1	23	24
GRIN2B	2	3	5
GRM1	0	5	5
GRN	0	6	6
GSS	0	12	12
GUCA1A	1	0	1
GUCY1A1	0	1	1
GUCY2D	0	13	13
HADH	0	1	1
HAND1	0	2	2
HAND2	0	2	2
HARS	0	5	5
HBB	0	1	1
HCCS	0	1	1
HCFC1	0	1	1
HCN2	0	1	1
HCN4	1	5	6
HCRTR2	0	1	1
HDAC8	0	15	15
HEPACAM	0	2	2
HESX1	0	2	2
HEXA	0	2	2
HFE	0	1	1
HGD	0	19	19
HHAT	0	1	1
HINT1	0	6	6
HJV	0	1	1
HK1	1	0	1
HLCS	0	4	4
HNF1B	0	1	1
HNF4A	0	4	4
HNMT	0	1	1
HNRNPK	0	1	1
HOGA1	0	5	5
HOXA13	1	0	1
HOXD4	0	1	1
HPGD	0	1	1
HPSE2	0	1	1
HRAS	3	1	4
HS6ST1	0	1	1
HSD17B10	0	3	3
HSD17B3	0	7	7
HSD3B2	0	3	3
HSPA9	0	2	2
HTRA1	0	11	11
IBA57	0	1	1
ICK	0	1	1
IDH2	2	0	2
IFIH1	8	0	8
IFNGR2	0	1	1
IGHMBP2	0	11	11
IGSF1	0	1	1
IKBKG	0	6	6
IL10	0	1	1
IL10RA	0	6	6
IL10RB	0	1	1
IL1RAPL1	0	1	1
IL21R	0	2	2
IL36RN	0	3	3
ILDR1	0	3	3
INS	2	0	2
INSL3	0	1	1
INSR	0	5	5
INVS	0	1	1
IRF3	0	1	1
IRF6	0	12	12
ISCA2	0	1	1
ISL1	1	0	1
ITGA2B	2	0	2
ITGA4	0	1	1
ITGB2	0	2	2
ITGB3	3	0	3
ITGB4	0	6	6
ITGB6	0	2	2
ITK	0	2	2
ITPA	0	1	1
JAG1	0	4	4
JPH2	0	2	2
KANK1	0	1	1
KARS1	0	1	1
KCNA1	0	1	1
KCNA5	0	2	2
KCNC1	0	1	1
KCNC3	3	0	3
KCND2	2	0	2
KCND3	2	3	5
KCNE1	2	1	3
KCNE2	2	1	3
KCNE3	1	1	2
KCNE5	2	0	2
KCNH1	11	0	11
KCNH2	5	26	31
KCNJ1	0	3	3
KCNJ10	1	8	9
KCNJ11	8	5	13
KCNJ2	4	21	25
KCNJ5	0	1	1
KCNJ8	1	1	2
KCNK17	1	0	1
KCNK3	0	7	7
KCNMA1	1	0	1
KCNN4	2	0	2
KCNQ1	12	42	54
KCNQ2	6	10	16
KCNQ3	0	2	2
KCNT1	2	0	2
KIF1A	0	2	2
KIF1B	0	1	1
KIF21A	1	0	1
KIRREL3	0	1	1
KISS1	0	1	1
KISS1R	0	13	13
KIT	6	3	9
KITLG	1	0	1
KL	0	1	1
KLF1	0	3	3
KLHL10	0	1	1
KLHL3	0	21	21
KRAS	2	1	3
KRIT1	0	1	1
KRT1	2	0	2
KRT16	0	1	1
KRT8	0	1	1
L1CAM	0	8	8
L2HGDH	0	3	3
LACC1	0	1	1
LAMC3	0	1	1
LBR	0	2	2
LCAT	0	2	2
LDLR	1	6	7
LEP	0	3	3
LEPR	0	1	1
LGI1	0	21	21
LHCGR	1	12	13
LHX4	0	1	1
LIM2	0	1	1
LIPA	0	4	4
LIPC	0	1	1
LIPG	0	4	4
LMNA	0	3	3
LMX1B	0	40	40
LPAR6	0	1	1
LPL	0	10	10
LRP4	0	1	1
LRP5	0	5	5
LRP6	0	9	9
LRRC6	0	2	2
LRRTM4	0	1	1
LZTR1	0	15	15
MAB21L2	0	2	2
MAF	0	7	7
MAFB	0	1	1
MAN1B1	0	1	1
MAP2K1	0	1	1
MAPT	1	0	1
MARS	0	2	2
MBTPS2	0	1	1
MC1R	0	8	8
MC2R	0	4	4
MC3R	0	1	1
MC4R	0	45	45
MCCC1	0	5	5
MCCC2	0	9	9
MCIDAS	0	2	2
MECP2	0	1	1
MEN1	0	5	5
MERTK	0	1	1
MESP1	0	2	2
MFAP5	0	1	1
MGME1	0	1	1
MID1	0	11	11
MKKS	0	2	2
MKRN3	0	1	1
MLC1	0	6	6
MLH1	0	81	81
MMACHC	0	15	15
MME	0	1	1
MMP13	0	3	3
MMP9	0	1	1
MMUT	0	7	7
MPL	0	6	6
MPO	0	1	1
MPV17	0	1	1
MPZ	0	1	1
MRAP2	0	1	1
MSH2	0	23	23
MSH6	0	5	5
MSRB3	0	1	1
MSX2	1	0	1
MTFMT	0	2	2
MTHFD1	0	1	1
MTNR1B	0	7	7
MTO1	0	2	2
MTTP	0	1	1
MVK	0	1	1
MXRA8	0	1	1
MYBPC3	0	5	5
MYD88	0	2	2
MYH7	0	12	12
MYH8	0	1	1
MYL3	0	1	1
MYLK	0	1	1
MYO1E	0	1	1
MYO5B	0	6	6
MYOC	0	1	1
MYPN	0	1	1
NAGLU	0	1	1
NALCN	1	1	2
NBN	0	2	2
NCF4	0	1	1
NDUFS8	0	3	3
NEU1	0	5	5
NEUROD1	0	1	1
NEUROG3	0	2	2
NFKB2	1	0	1
NFKBIA	3	0	3
NGLY1	0	1	1
NHLRC1	0	2	2
NHS	0	1	1
NKX2-5	0	3	3
NKX2-6	0	2	2
NLGN2	0	1	1
NLGN3	0	1	1
NLGN4X	0	1	1
NLRC4	2	0	2
NLRP12	1	0	1
NLRP3	21	0	21
NOBOX	0	4	4
NOD2	2	0	2
NOG	0	4	4
NPC1	0	2	2
NPC1L1	0	8	8
NPEPPS	0	1	1
NPHP3	0	1	1
NPHP4	0	18	18
NPHS1	0	8	8
NPPA	1	0	1
NPR2	1	2	3
NR0B1	0	22	22
NR5A1	0	6	6
NRAS	3	0	3
NRL	1	0	1
NSUN2	0	1	1
NT5E	0	1	1
NTRK1	0	10	10
NUS1	0	1	1
NXPH3	0	1	1
OCA2	0	3	3
OCRL	0	6	6
OPA1	0	1	1
OPN1LW	0	2	2
OPN1MW	0	2	2
OPTN	2	1	3
P2RX2	0	1	1
PACS1	1	0	1
PAFAH1B1	0	5	5
PAH	0	14	14
PAK3	0	1	1
PANK2	0	10	10
PAPSS2	0	2	2
PARK7	0	4	4
PAX2	0	1	1
PAX3	0	11	11
PAX6	0	6	6
PAX8	0	7	7
PAX9	0	4	4
PCBD1	0	1	1
PCCA	0	1	1
PCDH19	0	3	3
PCSK1	0	1	1
PCSK9	12	5	17
PCYT1A	0	1	1
PDCD10	0	1	1
PDE3A	6	0	6
PDE4D	0	6	6
PDE6A	0	1	1
PDGFB	0	3	3
PDGFRB	2	3	5
PDHA1	0	2	2
PEPD	0	2	2
PEX1	0	3	3
PEX6	0	4	4
PFN1	1	0	1
PHEX	0	5	5
PHGDH	1	0	1
PIGN	0	2	2
PIK3CD	3	0	3
PINK1	0	5	5
PITX2	0	1	1
PKLR	0	2	2
PKP2	0	1	1
PLA2G5	0	2	2
PLA2G6	0	2	2
PLCB1	0	1	1
PLCG2	1	0	1
PLG	0	1	1
PLN	0	3	3
PLP1	2	0	2
PMM2	0	15	15
PMP22	0	2	2
PNPLA6	0	3	3
POGLUT1	0	1	1
POGZ	0	1	1
POLG	0	2	2
POLH	0	1	1
POLR1A	0	2	2
POLR3B	1	0	1
POMC	0	1	1
POMGNT1	0	1	1
POMGNT2	0	1	1
POMK	0	1	1
POMT2	0	3	3
POP1	0	1	1
PORCN	0	10	10
POT1	0	3	3
POU1F1	0	1	1
POU3F4	0	1	1
PPARG	0	17	17
PPP2R5D	2	1	3
PRDM6	0	3	3
PRDM8	1	0	1
PRF1	0	2	2
PRKAG2	0	1	1
PRKAG3	1	0	1
PRKCA	3	0	3
PRKCD	0	1	1
PRKN	0	20	20
PRLR	0	1	1
PRNP	0	15	15
PROC	1	0	1
PROK2	0	4	4
PROKR2	0	25	25
PROS1	0	3	3
PRPF31	1	0	1
PRPF4	0	1	1
PRPH2	0	1	1
PRPS1	0	5	5
PRRT2	0	6	6
PRSS1	5	1	6
PRUNE1	0	3	3
PSEN1	2	18	20
PSEN2	0	6	6
PSMB8	0	5	5
PSMB9	0	1	1
PSPH	0	1	1
PTCHD1	0	1	1
PTDSS1	4	0	4
PTEN	0	46	46
PTH1R	0	3	3
PTHLH	0	2	2
PTPN11	29	1	30
PTS	0	2	2
PYCR2	0	2	2
PYGM	0	2	2
QARS	0	4	4
RAB10	0	1	1
RAB18	0	1	1
RAB39B	0	1	1
RAD21	0	2	2
RAD51B	0	1	1
RAF1	15	0	15
RAG1	0	1	1
RARS2	0	1	1
RB1	0	4	4
RBM20	0	7	7
RBM28	0	1	1
RDH12	0	10	10
REN	0	2	2
RET	4	12	16
RFX6	0	2	2
RFXANK	0	1	1
RHO	1	1	2
RIT1	4	0	4
RMND1	0	2	2
RNASET2	0	1	1
ROR2	1	0	1
RORC	0	1	1
RPE65	1	10	11
RPGRIP1L	0	9	9
RPL10	0	1	1
RPL35A	0	1	1
RPL5	0	1	1
RPS19	0	3	3
RPS6KA3	0	17	17
RS1	0	43	43
RSPH1	0	1	1
RSPH4A	0	1	1
RUNX2	0	8	8
SAMD9L	1	0	1
SARS2	0	1	1
SCN10A	4	0	4
SCN11A	8	0	8
SCN1A	4	14	18
SCN1B	0	3	3
SCN2A	4	2	6
SCN2B	0	3	3
SCN3A	0	1	1
SCN3B	0	4	4
SCN4A	3	2	5
SCN4B	0	1	1
SCN5A	16	47	63
SCN8A	6	1	7
SCNN1B	2	1	3
SCNN1G	1	0	1
SCO1	0	1	1
SDHA	0	3	3
SDHAF2	0	1	1
SDHB	0	2	2
SEC24B	0	4	4
SEMA3A	0	1	1
SEMA3C	0	1	1
SEMA3D	0	2	2
SEPTIN12	0	2	2
SERPINA1	0	4	4
SERPINA3	0	2	2
SERPINC1	0	2	2
SERPIND1	0	1	1
SERPINI1	0	1	1
SETBP1	6	0	6
SFTPC	1	0	1
SH2B1	0	3	3
SH2D1A	0	1	1
SHBG	0	1	1
SHH	0	46	46
SHOC2	0	1	1
SIAE	0	11	11
SIGMAR1	0	1	1
SIM1	0	6	6
SIPA1L1	0	1	1
SIX1	0	6	6
SIX3	0	34	34
SLC11A2	0	1	1
SLC12A1	0	2	2
SLC12A2	1	0	1
SLC12A3	0	52	52
SLC12A5	0	5	5
SLC13A5	0	3	3
SLC16A2	0	12	12
SLC1A1	0	1	1
SLC1A3	1	0	1
SLC20A2	0	1	1
SLC22A12	0	15	15
SLC22A5	0	3	3
SLC25A15	1	0	1
SLC25A4	0	3	3
SLC25A46	0	4	4
SLC26A2	0	2	2
SLC26A4	7	2	9
SLC29A3	0	2	2
SLC2A1	0	12	12
SLC2A2	4	0	4
SLC2A9	0	7	7
SLC30A2	0	3	3
SLC34A2	0	1	1
SLC34A3	0	7	7
SLC35D1	0	1	1
SLC37A4	0	5	5
SLC39A13	0	1	1
SLC39A5	0	1	1
SLC40A1	1	6	7
SLC46A1	0	9	9
SLC4A1	0	3	3
SLC4A11	0	5	5
SLC4A4	0	3	3
SLC52A2	0	1	1
SLC5A5	0	4	4
SLC6A1	0	4	4
SLC6A19	0	2	2
SLC6A2	0	1	1
SLC6A3	6	8	14
SLC6A8	0	1	1
SLC7A9	0	3	3
SLC9A1	0	1	1
SLCO2A1	0	1	1
SLX4	0	7	7
SMAD2	0	1	1
SMAD3	0	1	1
SMAD4	1	0	1
SMARCA2	0	1	1
SMARCAL1	0	1	1
SMC1A	0	2	2
SMC3	0	2	2
SMCHD1	0	1	1
SMPD1	0	1	1
SMS	0	1	1
SNCA	1	0	1
SNTA1	2	0	2
SOCS3	0	1	1
SOD1	21	3	24
SOS1	21	0	21
SOST	0	1	1
SOX10	0	5	5
SOX11	0	3	3
SOX2	0	5	5
SPAG1	0	1	1
SPAST	2	4	6
SPECC1L	0	1	1
SPG7	0	1	1
SPINK1	1	1	2
SPINT2	0	2	2
SPRED1	0	4	4
SPTLC1	2	0	2
SRC	1	0	1
STAR	2	6	8
STAT1	34	3	37
STAT3	5	14	19
STIL	0	2	2
STIM1	0	4	4
STK11	0	3	3
STUB1	0	1	1
STXBP1	0	3	3
SUCLA2	0	2	2
SUCLG1	0	2	2
SUPT5H	0	1	1
SURF1	0	1	1
SYN1	0	2	2
SYNGAP1	0	2	2
SYT1	0	1	1
TAC3	0	1	1
TACR3	0	6	6
TAF1	0	1	1
TAFAZZIN	0	1	1
TARDBP	3	5	8
TAZ	0	14	14
TBC1D24	0	2	2
TBK1	0	13	13
TBL1XR1	0	4	4
TBR1	0	1	1
TBX1	0	2	2
TBX19	1	6	7
TBX20	0	2	2
TBX22	0	2	2
TBX4	0	2	2
TBX5	2	7	9
TBXA2R	0	3	3
TBXT	0	1	1
TCF12	0	1	1
TCF4	0	1	1
TDGF1	0	1	1
TDP1	0	1	1
TEAD1	0	1	1
TEK	1	0	1
TELO2	0	5	5
TERT	0	16	16
TGDS	0	5	5
TGFB2	0	1	1
TGFB3	0	2	2
TGFBR1	0	5	5
TGFBR2	0	4	4
TGFBR3	0	1	1
THBD	0	1	1
THBS1	0	1	1
THPO	0	1	1
TIMM44	0	1	1
TIMM8A	0	1	1
TK2	0	2	2
TLR3	0	6	6
TMC1	1	2	3
TMEM173	2	0	2
TMEM67	0	1	1
TMIE	0	3	3
TMLHE	0	2	2
TMPRSS6	0	3	3
TNFRSF11B	0	2	2
TNFRSF1A	4	0	4
TNFRSF6B	2	0	2
TNNI3	0	1	1
TNNI3K	0	1	1
TNNT2	0	1	1
TP53	3	13	16
TP63	11	0	11
TPH2	0	1	1
TPM2	7	0	7
TPM3	7	0	7
TPO	0	5	5
TPP1	0	1	1
TRAF3	0	1	1
TREM2	0	2	2
TREX1	0	3	3
TRIM63	0	2	2
TRNT1	0	7	7
TRPA1	1	0	1
TRPM4	4	0	4
TRPM6	0	5	5
TRPV3	4	0	4
TRPV4	18	1	19
TSC1	0	1	1
TSC2	0	5	5
TTC19	0	2	2
TTC7A	0	2	2
TTLL5	0	1	1
TTR	0	1	1
TUBA1A	0	1	1
TUBB4A	4	0	4
TWIST1	0	12	12
TYMP	0	4	4
TYR	0	1	1
TYROBP	0	1	1
UBE3A	0	13	13
UBE3B	0	1	1
UCHL1	0	1	1
UMOD	3	2	5
UNC13D	0	4	4
UROD	0	1	1
UROS	0	1	1
VANGL1	0	3	3
VAPB	1	0	1
VCP	0	1	1
VHL	0	3	3
VLDLR	0	2	2
VPS35	0	1	1
VSX2	0	2	2
WAS	0	4	4
WDR11	0	5	5
WDR36	0	2	2
WFS1	0	15	15
WNT4	0	3	3
WNT7A	0	1	1
XYLT1	0	1	1
ZBTB16	0	1	1
ZC4H2	0	3	3
ZDHHC9	0	2	2
ZEB1	0	3	3
ZEB2	0	4	4
ZIC1	1	0	1
ZIC2	0	20	20
ZMPSTE24	0	5	5
ZMYND11	0	1	1
ZNF423	0	2	2
ZNF711	0	1	1
