# Supplementary material for: Learning sequence to predict gain- or loss-of-function variants
Source: Research Square preprint supplement (doi:10.21203/rs.3.rs-6705195/v1), 2025-06-06
Supplement: Supplementary file 3 [file b6eb795ebe34a9568cea7334.xlsx]

## Sheet: Supplementary Table 3
Feature	Description	Source	genetic_feature
BIOTYPE	Biotype of transcript or regulatory feature.	https://useast.ensembl.org/info/docs/tools/vep/index.html	TRUE
CADD	CADD score	https://useast.ensembl.org/info/docs/tools/vep/index.html	TRUE
BLOSUM62	Amino acid substitution score from the BLOSUM 62 matrix.	https://useast.ensembl.org/info/docs/tools/vep/index.html	TRUE
Conservation	GERP scores from the EPO 35 way mammalian alignment.	https://useast.ensembl.org/info/docs/tools/vep/index.html	TRUE
ProteinLengthChange	Change in protein length as a result of variant.	https://useast.ensembl.org/info/docs/tools/vep/index.html	TRUE
MaxEntScan_alt	Splice affect score for the alternate AA.	https://useast.ensembl.org/info/docs/tools/vep/index.html	TRUE
MaxEntScan_diff	Difference of alt and ref splicing scores.	https://useast.ensembl.org/info/docs/tools/vep/index.html	TRUE
MaxEntScan_ref	Splice affect score for the reference AA.	https://useast.ensembl.org/info/docs/tools/vep/index.html	TRUE
TSSDistance	The distance from the transcription start site for upstream variants	https://useast.ensembl.org/info/docs/tools/vep/index.html	TRUE
ada_score	dbscSNV adaboost meta-predictor for spice-altering variants.	https://useast.ensembl.org/info/docs/tools/vep/index.html	TRUE
rf_score	dbscSNV randomforest meta-predictor for spice-altering variants.	https://useast.ensembl.org/info/docs/tools/vep/index.html	TRUE
1000Gp3_AF	1000 genomes project allele frequency ? all.	https://useast.ensembl.org/info/docs/tools/vep/index.html	TRUE
FATHMM_score	FATHMM score.	https://useast.ensembl.org/info/docs/tools/vep/index.html	TRUE
GERP++ NR	GERP++ neutral rate.	https://useast.ensembl.org/info/docs/tools/vep/index.html	TRUE
GERP++ RS	GERP++ RS value.	https://useast.ensembl.org/info/docs/tools/vep/index.html	TRUE
GM12878_fitCons_score	fitCons score based on cell type GM12878.	https://useast.ensembl.org/info/docs/tools/vep/index.html	TRUE
GenoCanyon_score	Prediction of the functional potential at each nucleotide	https://useast.ensembl.org/info/docs/tools/vep/index.html	TRUE
H1_hESC_fitCons_score	fitCons score based on cell type H1_hESC.	https://useast.ensembl.org/info/docs/tools/vep/index.html	TRUE
HUVEC_fitCons_score	fitCons score based on cell type HUVEC.	https://useast.ensembl.org/info/docs/tools/vep/index.html	TRUE
LINSIGHT	LINSIGHT score.	https://useast.ensembl.org/info/docs/tools/vep/index.html	TRUE
LIST_S2_score	LIST-S2 score.	https://useast.ensembl.org/info/docs/tools/vep/index.html	TRUE
LRT_score	LRT score.	https://useast.ensembl.org/info/docs/tools/vep/index.html	TRUE
M_CAP_score	M-CAP score.	https://useast.ensembl.org/info/docs/tools/vep/index.html	TRUE
MPC_score	MPC score.	https://useast.ensembl.org/info/docs/tools/vep/index.html	TRUE
MVP_score	MVP score.	https://useast.ensembl.org/info/docs/tools/vep/index.html	TRUE
MutationAssessor_score	Mutation Assessor score.	https://useast.ensembl.org/info/docs/tools/vep/index.html	FALSE
MutationTaster_score	Mutation Taster score.	https://useast.ensembl.org/info/docs/tools/vep/index.html	TRUE
PROVEAN_score	PROVEAN score.	https://useast.ensembl.org/info/docs/tools/vep/index.html	FALSE
SiPhy_29way_logOdds	SiPhy score based on 29 mammals genomes.	https://useast.ensembl.org/info/docs/tools/vep/index.html	TRUE
UK10K_AF	UK10K allele frequency.	https://useast.ensembl.org/info/docs/tools/vep/index.html	TRUE
VEST4_score	VEST4 score.	https://useast.ensembl.org/info/docs/tools/vep/index.html	TRUE
fathmm_MKL_coding_score	FATHMM-MKL score.	https://useast.ensembl.org/info/docs/tools/vep/index.html	TRUE
fathmm_XF_coding_score	FATHMM-XF score.	https://useast.ensembl.org/info/docs/tools/vep/index.html	TRUE
integrated_fitCons_score	fitCons score based on three cell types.	https://useast.ensembl.org/info/docs/tools/vep/index.html	TRUE
phastCons100way_vertebrate	Conservation score based on multiple alignments of 100 vertebrate genomes including human.	https://useast.ensembl.org/info/docs/tools/vep/index.html	TRUE
phastCons17way_primate	Conservation score based on multiple alignments of 17 primate genomes including human.	https://useast.ensembl.org/info/docs/tools/vep/index.html	TRUE
phastCons30way_mammalian	Conservation score based on multiple alignments of 30 mammalian genomes including human.	https://useast.ensembl.org/info/docs/tools/vep/index.html	TRUE
phyloP100way_vertebrate	Conservation score based on multiple alignments of 100 vertebrate genomes including human.	https://useast.ensembl.org/info/docs/tools/vep/index.html	TRUE
phyloP17way_primate	Conservation score based on multiple alignments of 17 primate genomes including human.	https://useast.ensembl.org/info/docs/tools/vep/index.html	TRUE
phyloP30way_mammalian	Conservation score based on multiple alignments of 30 mammalian genomes including human.	https://useast.ensembl.org/info/docs/tools/vep/index.html	TRUE
NMD	Prediction indicating stop_gained variant allowing for transcript escape of nonsense-mediated mRNA decay	https://useast.ensembl.org/info/docs/tools/vep/index.html	TRUE
GDI	The accumulated mutational damage of each human gene in healthy human population.	http://pec630.rockefeller.edu:8080/GDI/	TRUE
MSC_95CI	The lower boundary of the 95% confidence interval generated by CADD for a gene.	http://lab.rockefeller.edu/casanova/MSC	TRUE
rel_cDNA_pos	cDNA position / cDNA length * 10.		TRUE
rel_CDS_pos	CDS position / CDS length * 10.		TRUE
rel_prot_pos	Protein position / Protein length * 10.		TRUE
Selective_pressure	Selective evolutionary pressure acting on a gene estimated by the McDonald?Kreitman neutrality index at the population level.	https://doi.org/10.1073/pnas.1518646112	TRUE
Clarks_distance	Estimate of the amino acid composition complexity of each protein.	https://doi.org/10.1073/pnas.1518646112	TRUE
CDS_len	Coding sequence length.	https://doi.org/10.1073/pnas.1518646112	TRUE
Number_of_paralogs	Number of paralogs for a gene.	http://useast.ensembl.org/biomart/martview/	TRUE
denovo_Zscore	Estimate of the rate of de novo mutation per gene and whether a given gene contains more de novo mutations than expected by chance alone.	https://doi.org/10.1038/ng.3050	TRUE
RVIS	Ranking of genes by whether they have more or less common functional genetic variation relative to the genome wide expectation given the amount of apparently neutral variation for the gene.	http://genic-intolerance.org	TRUE
Indispensability_score	Estimates gene essentiality on the basis of a gene’s network and evolutionary properties.	https://doi.org/10.1371/journal.pcbi.1002886	TRUE
Protein_dom	Pfam or interpro domain.	http://useast.ensembl.org/biomart/martview/	TRUE
RSA	Relative solvent accessibility.	https://services.healthtech.dtu.dk/software.php#	FALSE
ASA	Absolute solvent accessibility.	https://services.healthtech.dtu.dk/software.php#	FALSE
RSA_Zfit	Reliability of the RSA prediction.	https://services.healthtech.dtu.dk/software.php#	FALSE
Phosphorylation	PTM.	http://dbptm.mbc.nctu.edu.tw	FALSE
Acetylation	PTM.	http://dbptm.mbc.nctu.edu.tw	FALSE
Methylation	PTM.	http://dbptm.mbc.nctu.edu.tw	FALSE
Ubiquitination	PTM.	http://dbptm.mbc.nctu.edu.tw	FALSE
Glycosylation	PTM.	http://dbptm.mbc.nctu.edu.tw	FALSE
PTM	1 if residue has any PTM, else 0.	http://dbptm.mbc.nctu.edu.tw	FALSE
Consequence_first	First reported consequence from VEP.	https://useast.ensembl.org/info/docs/tools/vep/index.html	TRUE
Condel_score	Condel score.	https://useast.ensembl.org/info/docs/tools/vep/index.html	TRUE
SIFT_score	SIFT score.	https://useast.ensembl.org/info/docs/tools/vep/index.html	TRUE
NearestExonJB_distance	Distance to nearest exon junction boundary within 10,000 bps.	https://useast.ensembl.org/info/docs/tools/vep/index.html	TRUE
NearestExonJB_len	Length of the nearest exon within 10,000 bps.	https://useast.ensembl.org/info/docs/tools/vep/index.html	TRUE
AF_dssp_secondary_structure	Secondary structure characterization of AlphaFold models from DSSP.		TRUE
AF_Relative_ASA	Relative solvent accessibility calculated with DSSP on AlphaFold models.		TRUE
IUPRED2	Disordered protein region prediction.	https://iupred2a.elte.hu/download_new	TRUE
ANCHOR2	Disordered binding region prediction.	https://iupred2a.elte.hu/download_new	TRUE
A3D_SCORE	Aggrescan3D score calculated on AlphaFold models.	http://biocomp.chem.uw.edu.pl/A3D2/hproteome	TRUE
n_contacts	The number of residue contacts calculated on AlphaFold models.		TRUE
distance_com	The residue distance from the protein center of mass calculated from AlphaFold models.		TRUE
concavity_score	Predicted ligand-binding sites calculated on AlphaFold models.	https://compbio.cs.princeton.edu/concavity/	TRUE
S_DDG[SEQ]	DDGun delta-delta G predictions from sequence.	https://github.com/biofold/ddgun	TRUE
STABILITY[SEQ]	Categorical DDGun delta-delta g predictions from sequence.	https://github.com/biofold/ddgun	TRUE
S_DDG[3D]	DDGun delta-delta G predictions from AlphaFold models.	https://github.com/biofold/ddgun	TRUE
STABILITY[3D]	Categorical DDGun delta-delta g predictions from AlphaFold models.	https://github.com/biofold/ddgun	TRUE
hgmd_mutcount	The number of HGMD variants proximal to a given residue in 3D space.		TRUE
gnomsingle_mutcount	The number of single occurrence gnomAD variants proximal to a given residue in 3D space.		TRUE
gnom_mutcount	The number of gnomAD variants proximal to a given residue in 3D space.		TRUE
AF_confidence	The AlphaFold pLDDT value for the residue.		TRUE
isHomomultimer	Indicated proteins which form homomultimers.	https://thebiogrid.org/	TRUE
num_interactions	The number of unique protein interactors for a protein.	https://thebiogrid.org/	TRUE
ppi_combined_0-63 (64 features in total)	64 dimensions summarizing the STRING PPI processed with node2vec.	https://stringdb-static.org/download/protein.links.full.v11.0/9606.protein.links.full.v11.0.txt.gz	TRUE
s_het	Genome-wide distribution of selective effects for heterozygous PTVs.	https://www.biorxiv.org/highwire/filestream/20869/field_highwire_adjunct_files/0/075523-1.xlsx	TRUE
DRNApredDNAscore_aa_window_3_prev	Mean prediction of DNA binding residues for 3 residue window before variant.	http://biomine.cs.vcu.edu/servers/DESCRIBEPROT/download_database/9606_database.json	TRUE
DRNApredDNAscore_aa_window_8_prev	Mean prediction of DNA binding residues for 8 residue window before variant.	http://biomine.cs.vcu.edu/servers/DESCRIBEPROT/download_database/9606_database.json	TRUE
DRNApredDNAscore_aa_window_15_prev	Mean prediction of DNA binding residues for 15 residue window before variant.	http://biomine.cs.vcu.edu/servers/DESCRIBEPROT/download_database/9606_database.json	TRUE
DRNApredDNAscore_aa_window_3_next	Mean prediction of DNA binding residues for 3 residue window after variant.	http://biomine.cs.vcu.edu/servers/DESCRIBEPROT/download_database/9606_database.json	TRUE
DRNApredDNAscore_aa_window_8_next	Mean prediction of DNA binding residues for 8 residue window after variant.	http://biomine.cs.vcu.edu/servers/DESCRIBEPROT/download_database/9606_database.json	TRUE
DRNApredDNAscore_aa_window_15_next	Mean prediction of DNA binding residues for 15 residue window after variant.	http://biomine.cs.vcu.edu/servers/DESCRIBEPROT/download_database/9606_database.json	TRUE
DRNApredDNAscore_aa	Prediction of DNA binding residues for the AA.	http://biomine.cs.vcu.edu/servers/DESCRIBEPROT/download_database/9606_database.json	TRUE
ASAquick_normscore_aa_window_3_prev	Mean prediction of normalized protein accessible surface area for 3 residue window before variant.	http://biomine.cs.vcu.edu/servers/DESCRIBEPROT/download_database/9606_database.json	TRUE
ASAquick_normscore_aa_window_8_prev	Mean prediction of normalized protein accessible surface area for 8 residue window before variant.	http://biomine.cs.vcu.edu/servers/DESCRIBEPROT/download_database/9606_database.json	TRUE
ASAquick_normscore_aa_window_15_prev	Mean prediction of normalized protein accessible surface area for 15 residue window before variant.	http://biomine.cs.vcu.edu/servers/DESCRIBEPROT/download_database/9606_database.json	TRUE
ASAquick_normscore_aa_window_3_next	Mean prediction of normalized protein accessible surface area for 3 residue window after variant.	http://biomine.cs.vcu.edu/servers/DESCRIBEPROT/download_database/9606_database.json	TRUE
ASAquick_normscore_aa_window_8_next	Mean prediction of normalized protein accessible surface area for 8 residue window after variant.	http://biomine.cs.vcu.edu/servers/DESCRIBEPROT/download_database/9606_database.json	TRUE
ASAquick_normscore_aa_window_15_next	Mean prediction of normalized protein accessible surface area for 15 residue window after variant.	http://biomine.cs.vcu.edu/servers/DESCRIBEPROT/download_database/9606_database.json	TRUE
ASAquick_normscore_aa	Prediction of normalized protein accessible surface area for the AA.	http://biomine.cs.vcu.edu/servers/DESCRIBEPROT/download_database/9606_database.json	TRUE
ASAquick_rawscore_aa_window_3_prev	Mean prediction of raw protein accessible surface area for 3 residue window before variant.	http://biomine.cs.vcu.edu/servers/DESCRIBEPROT/download_database/9606_database.json	TRUE
ASAquick_rawscore_aa_window_8_prev	Mean prediction of raw protein accessible surface area for 8 residue window before variant.	http://biomine.cs.vcu.edu/servers/DESCRIBEPROT/download_database/9606_database.json	TRUE
ASAquick_rawscore_aa_window_15_prev	Mean prediction of raw protein accessible surface area for 15 residue window before variant.	http://biomine.cs.vcu.edu/servers/DESCRIBEPROT/download_database/9606_database.json	TRUE
ASAquick_rawscore_aa_window_3_next	Mean prediction of raw protein accessible surface area for 3 residue window after variant.	http://biomine.cs.vcu.edu/servers/DESCRIBEPROT/download_database/9606_database.json	TRUE
ASAquick_rawscore_aa_window_8_next	Mean prediction of raw protein accessible surface area for 8 residue window after variant.	http://biomine.cs.vcu.edu/servers/DESCRIBEPROT/download_database/9606_database.json	TRUE
ASAquick_rawscore_aa_window_15_next	Mean prediction of raw protein accessible surface area for 15 residue window after variant.	http://biomine.cs.vcu.edu/servers/DESCRIBEPROT/download_database/9606_database.json	TRUE
ASAquick_rawscore_aa	Prediction of protein accessible surface area for the AA.	http://biomine.cs.vcu.edu/servers/DESCRIBEPROT/download_database/9606_database.json	TRUE
DFLpredScore_aa_window_3_prev	Mean prediction of disordered flexible linker for 3 residue window before variant.	http://biomine.cs.vcu.edu/servers/DESCRIBEPROT/download_database/9606_database.json	TRUE
DFLpredScore_aa_window_8_prev	Mean prediction of disordered flexible linker for 8 residue window before variant.	http://biomine.cs.vcu.edu/servers/DESCRIBEPROT/download_database/9606_database.json	TRUE
DFLpredScore_aa_window_15_prev	Mean prediction of disordered flexible linker for 15 residue window before variant.	http://biomine.cs.vcu.edu/servers/DESCRIBEPROT/download_database/9606_database.json	TRUE
DFLpredScore_aa_window_3_next	Mean prediction of disordered flexible linker for 3 residue window after variant.	http://biomine.cs.vcu.edu/servers/DESCRIBEPROT/download_database/9606_database.json	TRUE
DFLpredScore_aa_window_8_next	Mean prediction of disordered flexible linker for 8 residue window after variant.	http://biomine.cs.vcu.edu/servers/DESCRIBEPROT/download_database/9606_database.json	TRUE
DFLpredScore_aa_window_15_next	Mean prediction of disordered flexible linker for 15 residue window after variant.	http://biomine.cs.vcu.edu/servers/DESCRIBEPROT/download_database/9606_database.json	TRUE
DFLpredScore_aa	Prediction of disordered flexible linker residues for the AA.	http://biomine.cs.vcu.edu/servers/DESCRIBEPROT/download_database/9606_database.json	TRUE
DRNApredRNAscore_aa_window_3_prev	Mean prediction of RNA binding residues for 3 residue window before variant.	http://biomine.cs.vcu.edu/servers/DESCRIBEPROT/download_database/9606_database.json	TRUE
DRNApredRNAscore_aa_window_8_prev	Mean prediction of RNA binding residues for 8 residue window before variant.	http://biomine.cs.vcu.edu/servers/DESCRIBEPROT/download_database/9606_database.json	TRUE
DRNApredRNAscore_aa_window_15_prev	Mean prediction of RNA binding residues for 15 residue window before variant.	http://biomine.cs.vcu.edu/servers/DESCRIBEPROT/download_database/9606_database.json	TRUE
DRNApredRNAscore_aa_window_3_next	Mean prediction of RNA binding residues for 3 residue window after variant.	http://biomine.cs.vcu.edu/servers/DESCRIBEPROT/download_database/9606_database.json	TRUE
DRNApredRNAscore_aa_window_8_next	Mean prediction of RNA binding residues for 8 residue window after variant.	http://biomine.cs.vcu.edu/servers/DESCRIBEPROT/download_database/9606_database.json	TRUE
DRNApredRNAscore_aa_window_15_next	Mean prediction of RNA binding residues for 15 residue window after variant.	http://biomine.cs.vcu.edu/servers/DESCRIBEPROT/download_database/9606_database.json	TRUE
DRNApredRNAscore_aa	Prediction of RNA binding residues for the AA.	http://biomine.cs.vcu.edu/servers/DESCRIBEPROT/download_database/9606_database.json	TRUE
DisoDNAscore_aa_window_3_prev	Mean prediction of disordered DNA binding residues for 3 residue window before variant.	http://biomine.cs.vcu.edu/servers/DESCRIBEPROT/download_database/9606_database.json	TRUE
DisoDNAscore_aa_window_8_prev	Mean prediction of disordered DNA binding residues for 8 residue window before variant.	http://biomine.cs.vcu.edu/servers/DESCRIBEPROT/download_database/9606_database.json	TRUE
DisoDNAscore_aa_window_15_prev	Mean prediction of disordered DNA binding residues for 15 residue window before variant.	http://biomine.cs.vcu.edu/servers/DESCRIBEPROT/download_database/9606_database.json	TRUE
DisoDNAscore_aa_window_3_next	Mean prediction of disordered DNA binding residues for 3 residue window after variant.	http://biomine.cs.vcu.edu/servers/DESCRIBEPROT/download_database/9606_database.json	TRUE
DisoDNAscore_aa_window_8_next	Mean prediction of disordered DNA binding residues for 8 residue window after variant.	http://biomine.cs.vcu.edu/servers/DESCRIBEPROT/download_database/9606_database.json	TRUE
DisoDNAscore_aa_window_15_next	Mean prediction of disordered DNA binding residues for 15 residue window after variant.	http://biomine.cs.vcu.edu/servers/DESCRIBEPROT/download_database/9606_database.json	TRUE
DisoDNAscore_aa	Prediction of disordered DNA binding residues for the AA.	http://biomine.cs.vcu.edu/servers/DESCRIBEPROT/download_database/9606_database.json	TRUE
DisoPROscore_aa_window_3_prev	Mean prediction of disordered protein binding residues for 3 residue window before variant.	http://biomine.cs.vcu.edu/servers/DESCRIBEPROT/download_database/9606_database.json	TRUE
DisoPROscore_aa_window_8_prev	Mean prediction of disordered protein binding residues for 8 residue window before variant.	http://biomine.cs.vcu.edu/servers/DESCRIBEPROT/download_database/9606_database.json	TRUE
DisoPROscore_aa_window_15_prev	Mean prediction of disordered protein binding residues for 15 residue window before variant.	http://biomine.cs.vcu.edu/servers/DESCRIBEPROT/download_database/9606_database.json	TRUE
DisoPROscore_aa_window_3_next	Mean prediction of disordered protein binding residues for 3 residue window after variant.	http://biomine.cs.vcu.edu/servers/DESCRIBEPROT/download_database/9606_database.json	TRUE
DisoPROscore_aa_window_8_next	Mean prediction of disordered protein binding residues for 8 residue window after variant.	http://biomine.cs.vcu.edu/servers/DESCRIBEPROT/download_database/9606_database.json	TRUE
DisoPROscore_aa_window_15_next	Mean prediction of disordered protein binding residues for 15 residue window after variant.	http://biomine.cs.vcu.edu/servers/DESCRIBEPROT/download_database/9606_database.json	TRUE
DisoPROscore_aa	Prediction of disordered protein binding residues for the AA.	http://biomine.cs.vcu.edu/servers/DESCRIBEPROT/download_database/9606_database.json	TRUE
DisoRNAscore_aa_window_3_prev	Mean prediction of disordered RNA binding residues for 3 residue window before variant.	http://biomine.cs.vcu.edu/servers/DESCRIBEPROT/download_database/9606_database.json	TRUE
DisoRNAscore_aa_window_8_prev	Mean prediction of disordered RNA binding residues for 8 residue window before variant.	http://biomine.cs.vcu.edu/servers/DESCRIBEPROT/download_database/9606_database.json	TRUE
DisoRNAscore_aa_window_15_prev	Mean prediction of disordered RNA binding residues for 15 residue window before variant.	http://biomine.cs.vcu.edu/servers/DESCRIBEPROT/download_database/9606_database.json	TRUE
DisoRNAscore_aa_window_3_next	Mean prediction of disordered RNA binding residues for 3 residue window after variant.	http://biomine.cs.vcu.edu/servers/DESCRIBEPROT/download_database/9606_database.json	TRUE
DisoRNAscore_aa_window_8_next	Mean prediction of disordered RNA binding residues for 8 residue window after variant.	http://biomine.cs.vcu.edu/servers/DESCRIBEPROT/download_database/9606_database.json	TRUE
DisoRNAscore_aa_window_15_next	Mean prediction of disordered RNA binding residues for 15 residue window after variant.	http://biomine.cs.vcu.edu/servers/DESCRIBEPROT/download_database/9606_database.json	TRUE
DisoRNAscore_aa	Prediction of disordered RNA binding residues for the AA.	http://biomine.cs.vcu.edu/servers/DESCRIBEPROT/download_database/9606_database.json	TRUE
MMseq2_conservation_level_aa_window_3_prev	MMseq2 based conservation score for 3 residue window before variant.	http://biomine.cs.vcu.edu/servers/DESCRIBEPROT/download_database/9606_database.json	TRUE
MMseq2_conservation_level_aa_window_8_prev	MMseq2 based conservation score for 8 residue window before variant.	http://biomine.cs.vcu.edu/servers/DESCRIBEPROT/download_database/9606_database.json	TRUE
MMseq2_conservation_level_aa_window_15_prev	MMseq2 based conservation score for 15 residue window before variant.	http://biomine.cs.vcu.edu/servers/DESCRIBEPROT/download_database/9606_database.json	TRUE
MMseq2_conservation_level_aa_window_3_next	MMseq2 based conservation score for 3 residue window after variant.	http://biomine.cs.vcu.edu/servers/DESCRIBEPROT/download_database/9606_database.json	TRUE
MMseq2_conservation_level_aa_window_8_next	MMseq2 based conservation score for 8 residue window after variant.	http://biomine.cs.vcu.edu/servers/DESCRIBEPROT/download_database/9606_database.json	TRUE
MMseq2_conservation_level_aa_window_15_next	MMseq2 based conservation score for 15 residue window after variant.	http://biomine.cs.vcu.edu/servers/DESCRIBEPROT/download_database/9606_database.json	TRUE
MMseq2_conservation_level_aa	MMseq2 based conservation score binned to deciles for aa.	http://biomine.cs.vcu.edu/servers/DESCRIBEPROT/download_database/9606_database.json	TRUE
MMseq2_conservation_score_aa_window_3_prev	MMseq2 based conservation score for 3 residue window before variant.	http://biomine.cs.vcu.edu/servers/DESCRIBEPROT/download_database/9606_database.json	TRUE
MMseq2_conservation_score_aa_window_8_prev	MMseq2 based conservation score for 8 residue window before variant.	http://biomine.cs.vcu.edu/servers/DESCRIBEPROT/download_database/9606_database.json	TRUE
MMseq2_conservation_score_aa_window_15_prev	MMseq2 based conservation score for 15 residue window before variant.	http://biomine.cs.vcu.edu/servers/DESCRIBEPROT/download_database/9606_database.json	TRUE
MMseq2_conservation_score_aa_window_3_next	MMseq2 based conservation score for 3 residue window after variant.	http://biomine.cs.vcu.edu/servers/DESCRIBEPROT/download_database/9606_database.json	TRUE
MMseq2_conservation_score_aa_window_8_next	MMseq2 based conservation score for 8 residue window after variant.	http://biomine.cs.vcu.edu/servers/DESCRIBEPROT/download_database/9606_database.json	TRUE
MMseq2_conservation_score_aa_window_15_next	MMseq2 based conservation score for 15 residue window after variant.	http://biomine.cs.vcu.edu/servers/DESCRIBEPROT/download_database/9606_database.json	TRUE
MMseq2_conservation_score_aa	MMseq2 based conservation score for aa.	http://biomine.cs.vcu.edu/servers/DESCRIBEPROT/download_database/9606_database.json	TRUE
MoRFchibiScore_aa_window_3_prev	Mean prediction of MoRF regions for 3 residue window before variant.	http://biomine.cs.vcu.edu/servers/DESCRIBEPROT/download_database/9606_database.json	TRUE
MoRFchibiScore_aa_window_8_prev	Mean prediction of MoRF regions for 8 residue window before variant.	http://biomine.cs.vcu.edu/servers/DESCRIBEPROT/download_database/9606_database.json	TRUE
MoRFchibiScore_aa_window_15_prev	Mean prediction of MoRF regions for 15 residue window before variant.	http://biomine.cs.vcu.edu/servers/DESCRIBEPROT/download_database/9606_database.json	TRUE
MoRFchibiScore_aa_window_3_next	Mean prediction of MoRF regions for 3 residue window after variant.	http://biomine.cs.vcu.edu/servers/DESCRIBEPROT/download_database/9606_database.json	TRUE
MoRFchibiScore_aa_window_8_next	Mean prediction of MoRF regions for 8 residue window after variant.	http://biomine.cs.vcu.edu/servers/DESCRIBEPROT/download_database/9606_database.json	TRUE
MoRFchibiScore_aa_window_15_next	Mean prediction of MoRF regions for 15 residue window after variant.	http://biomine.cs.vcu.edu/servers/DESCRIBEPROT/download_database/9606_database.json	TRUE
MoRFchibiScore_aa	Prediction of MoRF regions for the AA.	http://biomine.cs.vcu.edu/servers/DESCRIBEPROT/download_database/9606_database.json	TRUE
PSIPRED_helix_aa_window_3_prev	Mean prediction of protein helices for 3 residue window before variant.	http://biomine.cs.vcu.edu/servers/DESCRIBEPROT/download_database/9606_database.json	TRUE
PSIPRED_helix_aa_window_8_prev	Mean prediction of protein helices for 8 residue window before variant.	http://biomine.cs.vcu.edu/servers/DESCRIBEPROT/download_database/9606_database.json	TRUE
PSIPRED_helix_aa_window_15_prev	Mean prediction of protein helices for 15 residue window before variant.	http://biomine.cs.vcu.edu/servers/DESCRIBEPROT/download_database/9606_database.json	TRUE
PSIPRED_helix_aa_window_3_next	Mean prediction of protein helices for 3 residue window after variant.	http://biomine.cs.vcu.edu/servers/DESCRIBEPROT/download_database/9606_database.json	TRUE
PSIPRED_helix_aa_window_8_next	Mean prediction of protein helices for 8 residue window after variant.	http://biomine.cs.vcu.edu/servers/DESCRIBEPROT/download_database/9606_database.json	TRUE
PSIPRED_helix_aa_window_15_next	Mean prediction of protein helices for 15 residue window after variant.	http://biomine.cs.vcu.edu/servers/DESCRIBEPROT/download_database/9606_database.json	TRUE
PSIPRED_helix_aa	Prediction of protein helices for the AA.	http://biomine.cs.vcu.edu/servers/DESCRIBEPROT/download_database/9606_database.json	TRUE
PSIPRED_strand_aa_window_3_prev	Mean prediction of protein strands for 3 residue window before variant.	http://biomine.cs.vcu.edu/servers/DESCRIBEPROT/download_database/9606_database.json	TRUE
PSIPRED_strand_aa_window_8_prev	Mean prediction of protein strands for 8 residue window before variant.	http://biomine.cs.vcu.edu/servers/DESCRIBEPROT/download_database/9606_database.json	TRUE
PSIPRED_strand_aa_window_15_prev	Mean prediction of protein strands for 15 residue window before variant.	http://biomine.cs.vcu.edu/servers/DESCRIBEPROT/download_database/9606_database.json	TRUE
PSIPRED_strand_aa_window_3_next	Mean prediction of protein strands for 3 residue window after variant.	http://biomine.cs.vcu.edu/servers/DESCRIBEPROT/download_database/9606_database.json	TRUE
PSIPRED_strand_aa_window_8_next	Mean prediction of protein strands for 8 residue window after variant.	http://biomine.cs.vcu.edu/servers/DESCRIBEPROT/download_database/9606_database.json	TRUE
PSIPRED_strand_aa_window_15_next	Mean prediction of protein strands for 15 residue window after variant.	http://biomine.cs.vcu.edu/servers/DESCRIBEPROT/download_database/9606_database.json	TRUE
PSIPRED_strand_aa	Prediction of protein strands for the AA.	http://biomine.cs.vcu.edu/servers/DESCRIBEPROT/download_database/9606_database.json	TRUE
SCRIBERscore_aa_window_3_prev	Mean prediction of protein binding residues for 3 residue window before variant.	http://biomine.cs.vcu.edu/servers/DESCRIBEPROT/download_database/9606_database.json	TRUE
SCRIBERscore_aa_window_8_prev	Mean prediction of protein binding residues for 8 residue window before variant.	http://biomine.cs.vcu.edu/servers/DESCRIBEPROT/download_database/9606_database.json	TRUE
SCRIBERscore_aa_window_15_prev	Mean prediction of protein binding residues for 15 residue window before variant.	http://biomine.cs.vcu.edu/servers/DESCRIBEPROT/download_database/9606_database.json	TRUE
SCRIBERscore_aa_window_3_next	Mean prediction of protein binding residues for 3 residue window after variant.	http://biomine.cs.vcu.edu/servers/DESCRIBEPROT/download_database/9606_database.json	TRUE
SCRIBERscore_aa_window_8_next	Mean prediction of protein binding residues for 8 residue window after variant.	http://biomine.cs.vcu.edu/servers/DESCRIBEPROT/download_database/9606_database.json	TRUE
SCRIBERscore_aa_window_15_next	Mean prediction of protein binding residues for 15 residue window after variant.	http://biomine.cs.vcu.edu/servers/DESCRIBEPROT/download_database/9606_database.json	TRUE
SCRIBERscore_aa	Prediction of protein binding residues for the AA.	http://biomine.cs.vcu.edu/servers/DESCRIBEPROT/download_database/9606_database.json	TRUE
SignalP_score_aa_window_3_prev	Mean prediction of signal peptides for 3 residue window before variant.	http://biomine.cs.vcu.edu/servers/DESCRIBEPROT/download_database/9606_database.json	TRUE
SignalP_score_aa_window_8_prev	Mean prediction of signal peptides for 8 residue window before variant.	http://biomine.cs.vcu.edu/servers/DESCRIBEPROT/download_database/9606_database.json	TRUE
SignalP_score_aa_window_15_prev	Mean prediction of signal peptides for 15 residue window before variant.	http://biomine.cs.vcu.edu/servers/DESCRIBEPROT/download_database/9606_database.json	TRUE
SignalP_score_aa_window_3_next	Mean prediction of signal peptides for 3 residue window after variant.	http://biomine.cs.vcu.edu/servers/DESCRIBEPROT/download_database/9606_database.json	TRUE
SignalP_score_aa_window_8_next	Mean prediction of signal peptides for 8 residue window after variant.	http://biomine.cs.vcu.edu/servers/DESCRIBEPROT/download_database/9606_database.json	TRUE
SignalP_score_aa_window_15_next	Mean prediction of signal peptides for 15 residue window after variant.	http://biomine.cs.vcu.edu/servers/DESCRIBEPROT/download_database/9606_database.json	TRUE
SignalP_score_aa	Prediction of signal peptides for the AA.	http://biomine.cs.vcu.edu/servers/DESCRIBEPROT/download_database/9606_database.json	TRUE
gtex_Adipose_-_Subcutaneous	GTEx tissue transcripts per million.	https://gtexportal.org/home/datasets	FALSE
gtex_Adipose_-_Visceral_(Omentum)	GTEx tissue transcripts per million.	https://gtexportal.org/home/datasets	FALSE
gtex_Adrenal_Gland	GTEx tissue transcripts per million.	https://gtexportal.org/home/datasets	FALSE
gtex_Artery_-_Aorta	GTEx tissue transcripts per million.	https://gtexportal.org/home/datasets	FALSE
gtex_Artery_-_Coronary	GTEx tissue transcripts per million.	https://gtexportal.org/home/datasets	FALSE
gtex_Artery_-_Tibial	GTEx tissue transcripts per million.	https://gtexportal.org/home/datasets	FALSE
gtex_Bladder	GTEx tissue transcripts per million.	https://gtexportal.org/home/datasets	FALSE
gtex_Brain_-_Amygdala	GTEx tissue transcripts per million.	https://gtexportal.org/home/datasets	FALSE
gtex_Brain_-_Anterior_cingulate_cortex_(BA24)	GTEx tissue transcripts per million.	https://gtexportal.org/home/datasets	FALSE
gtex_Brain_-_Caudate_(basal_ganglia)	GTEx tissue transcripts per million.	https://gtexportal.org/home/datasets	FALSE
gtex_Brain_-_Cerebellar_Hemisphere	GTEx tissue transcripts per million.	https://gtexportal.org/home/datasets	FALSE
gtex_Brain_-_Cerebellum	GTEx tissue transcripts per million.	https://gtexportal.org/home/datasets	FALSE
gtex_Brain_-_Cortex	GTEx tissue transcripts per million.	https://gtexportal.org/home/datasets	FALSE
gtex_Brain_-_Frontal_Cortex_(BA9)	GTEx tissue transcripts per million.	https://gtexportal.org/home/datasets	FALSE
gtex_Brain_-_Hippocampus	GTEx tissue transcripts per million.	https://gtexportal.org/home/datasets	FALSE
gtex_Brain_-_Hypothalamus	GTEx tissue transcripts per million.	https://gtexportal.org/home/datasets	FALSE
gtex_Brain_-_Nucleus_accumbens_(basal_ganglia)	GTEx tissue transcripts per million.	https://gtexportal.org/home/datasets	FALSE
gtex_Brain_-_Putamen_(basal_ganglia)	GTEx tissue transcripts per million.	https://gtexportal.org/home/datasets	FALSE
gtex_Brain_-_Spinal_cord_(cervical_c-1)	GTEx tissue transcripts per million.	https://gtexportal.org/home/datasets	FALSE
gtex_Brain_-_Substantia_nigra	GTEx tissue transcripts per million.	https://gtexportal.org/home/datasets	FALSE
gtex_Breast_-_Mammary_Tissue	GTEx tissue transcripts per million.	https://gtexportal.org/home/datasets	FALSE
gtex_Cells_-_Cultured_fibroblasts	GTEx tissue transcripts per million.	https://gtexportal.org/home/datasets	FALSE
gtex_Cells_-_EBV-transformed_lymphocytes	GTEx tissue transcripts per million.	https://gtexportal.org/home/datasets	FALSE
gtex_Cervix_-_Ectocervix	GTEx tissue transcripts per million.	https://gtexportal.org/home/datasets	FALSE
gtex_Cervix_-_Endocervix	GTEx tissue transcripts per million.	https://gtexportal.org/home/datasets	FALSE
gtex_Colon_-_Sigmoid	GTEx tissue transcripts per million.	https://gtexportal.org/home/datasets	FALSE
gtex_Colon_-_Transverse	GTEx tissue transcripts per million.	https://gtexportal.org/home/datasets	FALSE
gtex_Esophagus_-_Gastroesophageal_Junction	GTEx tissue transcripts per million.	https://gtexportal.org/home/datasets	FALSE
gtex_Esophagus_-_Mucosa	GTEx tissue transcripts per million.	https://gtexportal.org/home/datasets	FALSE
gtex_Esophagus_-_Muscularis	GTEx tissue transcripts per million.	https://gtexportal.org/home/datasets	FALSE
gtex_Fallopian_Tube	GTEx tissue transcripts per million.	https://gtexportal.org/home/datasets	FALSE
gtex_Heart_-_Atrial_Appendage	GTEx tissue transcripts per million.	https://gtexportal.org/home/datasets	FALSE
gtex_Heart_-_Left_Ventricle	GTEx tissue transcripts per million.	https://gtexportal.org/home/datasets	FALSE
gtex_Kidney_-_Cortex	GTEx tissue transcripts per million.	https://gtexportal.org/home/datasets	FALSE
gtex_Kidney_-_Medulla	GTEx tissue transcripts per million.	https://gtexportal.org/home/datasets	FALSE
gtex_Liver	GTEx tissue transcripts per million.	https://gtexportal.org/home/datasets	FALSE
gtex_Lung	GTEx tissue transcripts per million.	https://gtexportal.org/home/datasets	FALSE
gtex_Minor_Salivary_Gland	GTEx tissue transcripts per million.	https://gtexportal.org/home/datasets	FALSE
gtex_Muscle_-_Skeletal	GTEx tissue transcripts per million.	https://gtexportal.org/home/datasets	FALSE
gtex_Nerve_-_Tibial	GTEx tissue transcripts per million.	https://gtexportal.org/home/datasets	FALSE
gtex_Ovary	GTEx tissue transcripts per million.	https://gtexportal.org/home/datasets	FALSE
gtex_Pancreas	GTEx tissue transcripts per million.	https://gtexportal.org/home/datasets	FALSE
gtex_Pituitary	GTEx tissue transcripts per million.	https://gtexportal.org/home/datasets	FALSE
gtex_Prostate	GTEx tissue transcripts per million.	https://gtexportal.org/home/datasets	FALSE
gtex_Skin_-_Not_Sun_Exposed_(Suprapubic)	GTEx tissue transcripts per million.	https://gtexportal.org/home/datasets	FALSE
gtex_Skin_-_Sun_Exposed_(Lower_leg)	GTEx tissue transcripts per million.	https://gtexportal.org/home/datasets	FALSE
gtex_Small_Intestine_-_Terminal_Ileum	GTEx tissue transcripts per million.	https://gtexportal.org/home/datasets	FALSE
gtex_Spleen	GTEx tissue transcripts per million.	https://gtexportal.org/home/datasets	FALSE
gtex_Stomach	GTEx tissue transcripts per million.	https://gtexportal.org/home/datasets	FALSE
gtex_Testis	GTEx tissue transcripts per million.	https://gtexportal.org/home/datasets	FALSE
gtex_Thyroid	GTEx tissue transcripts per million.	https://gtexportal.org/home/datasets	FALSE
gtex_Uterus	GTEx tissue transcripts per million.	https://gtexportal.org/home/datasets	FALSE
gtex_Vagina	GTEx tissue transcripts per million.	https://gtexportal.org/home/datasets	FALSE
gtex_Whole_Blood	GTEx tissue transcripts per million.	https://gtexportal.org/home/datasets	FALSE
haplo	Predicted probability of gene haploinsufficiency.	https://journals.plos.org/plosgenetics/article?id=10.1371/journal.pgen.1001154	TRUE
haplo_imputed	Predicted probability of gene haploinsufficiency with multiple imputation for missing features.	https://journals.plos.org/plosgenetics/article?id=10.1371/journal.pgen.1001154	TRUE
PHOSPHORYLATION	PTM.	http://dbptm.mbc.nctu.edu.tw	FALSE
ACETYLATION	PTM.	http://dbptm.mbc.nctu.edu.tw	FALSE
UBIQUITINATION	PTM.	http://dbptm.mbc.nctu.edu.tw	FALSE
S-NITROSYLATION	PTM.	http://dbptm.mbc.nctu.edu.tw	FALSE
N-GLYCOSYLATION	PTM.	http://dbptm.mbc.nctu.edu.tw	FALSE
METHYLATION	PTM.	http://dbptm.mbc.nctu.edu.tw	FALSE
O-GLYCOSYLATION	PTM.	http://dbptm.mbc.nctu.edu.tw	FALSE
MYRISTOYLATION	PTM.	http://dbptm.mbc.nctu.edu.tw	FALSE
C-GLYCOSYLATION	PTM.	http://dbptm.mbc.nctu.edu.tw	FALSE
SUMOYLATION	PTM.	http://dbptm.mbc.nctu.edu.tw	FALSE
S-GLYCOSYLATION	PTM.	http://dbptm.mbc.nctu.edu.tw	FALSE
Dominant_probability	Prediction of variants pathogenic for autosomal dominant disease.	https://zenodo.org/record/5620519/files/MOI-Pred_hg38_allchr.txt.gz?download=1	TRUE
Recessive_probability	Prediction of variants pathogenic for autosomal recessive disease.	https://zenodo.org/record/5620519/files/MOI-Pred_hg38_allchr.txt.gz?download=1	TRUE
polyphen_dscore	Difference of PSIC scores for two amino acid residue variants (score1 ? score2).	ftp://genetics.bwh.harvard.edu/pph2/whess/polyphen-2.2.2-whess-2011_12.sqlite.bz12	TRUE
polyphen_score1	PSIC score for wild type AA residue.	ftp://genetics.bwh.harvard.edu/pph2/whess/polyphen-2.2.2-whess-2011_12.sqlite.bz13	TRUE
polyphen_score2	PSIC score for mutant AA residue.	ftp://genetics.bwh.harvard.edu/pph2/whess/polyphen-2.2.2-whess-2011_12.sqlite.bz14	TRUE
polyphen_nobs	Number of residues observed at the substitution position in multiple alignment (without gaps).	ftp://genetics.bwh.harvard.edu/pph2/whess/polyphen-2.2.2-whess-2011_12.sqlite.bz15	TRUE
polyphen_normasa	Normalized accessible surface area.	ftp://genetics.bwh.harvard.edu/pph2/whess/polyphen-2.2.2-whess-2011_12.sqlite.bz16	TRUE
polyphen_dvol	Change in residue side chain volume.	ftp://genetics.bwh.harvard.edu/pph2/whess/polyphen-2.2.2-whess-2011_12.sqlite.bz17	TRUE
polyphen_dprop	Change in solvent accessible surface propensity resulting from the substitution.	ftp://genetics.bwh.harvard.edu/pph2/whess/polyphen-2.2.2-whess-2011_12.sqlite.bz18	TRUE
polyphen_bfact	Normalized B-factor (temperature factor) for the residue.	ftp://genetics.bwh.harvard.edu/pph2/whess/polyphen-2.2.2-whess-2011_12.sqlite.bz19	TRUE
polyphen_hbonds	The number of hydrogen sidechain-sidechain and sidechain-mainchain bonds formed by the residue .	ftp://genetics.bwh.harvard.edu/pph2/whess/polyphen-2.2.2-whess-2011_12.sqlite.bz20	TRUE
polyphen_avenhet	The number of residue contacts with heteroatoms, average per homologous PDB chain	ftp://genetics.bwh.harvard.edu/pph2/whess/polyphen-2.2.2-whess-2011_12.sqlite.bz21	TRUE
polyphen_mindhet	The closest residue contact with a heteroatom, ?.	ftp://genetics.bwh.harvard.edu/pph2/whess/polyphen-2.2.2-whess-2011_12.sqlite.bz22	TRUE
polyphen_avenint	Number of residue contacts with other chains, average per homologous PDB chain.	ftp://genetics.bwh.harvard.edu/pph2/whess/polyphen-2.2.2-whess-2011_12.sqlite.bz23	TRUE
polyphen_mindint	Closest residue contact with other chain, ?.	ftp://genetics.bwh.harvard.edu/pph2/whess/polyphen-2.2.2-whess-2011_12.sqlite.bz24	TRUE
polyphen_avensit	The number of residue contacts with critical sites, average per homologous PDB chain.	ftp://genetics.bwh.harvard.edu/pph2/whess/polyphen-2.2.2-whess-2011_12.sqlite.bz25	TRUE
polyphen_mindsit	The closest residue contact with a critical site, ?.	ftp://genetics.bwh.harvard.edu/pph2/whess/polyphen-2.2.2-whess-2011_12.sqlite.bz26	TRUE
polyphen_idpmax	Maximum congruency of the mutant amino acid residue to all sequences in multiple alignment.	ftp://genetics.bwh.harvard.edu/pph2/whess/polyphen-2.2.2-whess-2011_12.sqlite.bz27	TRUE
polyphen_idpsnp	Maximum congruency of the mutant amino acid residue to the sequences in multiple alignment with the mutant residue.	ftp://genetics.bwh.harvard.edu/pph2/whess/polyphen-2.2.2-whess-2011_12.sqlite.bz28	TRUE
polyphen_idqmin	Query sequence identity with the closest homologue deviating from the wild type amino acid residue.	ftp://genetics.bwh.harvard.edu/pph2/whess/polyphen-2.2.2-whess-2011_12.sqlite.bz29	TRUE
ConsScore	Score assigned to VEP consequence.	https://krishna.gs.washington.edu/download/CADD/v1.6/GRCh38/annotationsGRCh38_v1.6.tar.gz	TRUE
GC	Percent GC in a window of +/- 75bp.	https://krishna.gs.washington.edu/download/CADD/v1.6/GRCh38/annotationsGRCh38_v1.6.tar.gz	TRUE
CpG	Percent CpG in a window of +/-75bp.	https://krishna.gs.washington.edu/download/CADD/v1.6/GRCh38/annotationsGRCh38_v1.6.tar.gz	TRUE
motifECount	Total number of overlapping motifs	https://krishna.gs.washington.edu/download/CADD/v1.6/GRCh38/annotationsGRCh38_v1.6.tar.gz	TRUE
motifEHIPos	Is the position considered highly informative for an overlapping motif by VEP?	https://krishna.gs.washington.edu/download/CADD/v1.6/GRCh38/annotationsGRCh38_v1.6.tar.gz	TRUE
motifEScoreChng	VEP score change for the overlapping motif site.	https://krishna.gs.washington.edu/download/CADD/v1.6/GRCh38/annotationsGRCh38_v1.6.tar.gz	TRUE
Dst2Splice	Distance to splice site in 20bp; positive: exonic, negative: intronic.	https://krishna.gs.washington.edu/download/CADD/v1.6/GRCh38/annotationsGRCh38_v1.6.tar.gz	TRUE
Dst2SplType	Closest splice site is ACCEPTOR or DONOR.	https://krishna.gs.washington.edu/download/CADD/v1.6/GRCh38/annotationsGRCh38_v1.6.tar.gz	TRUE
minDistTSS	Distance to closest Transcribed Sequence Start (TSS).	https://krishna.gs.washington.edu/download/CADD/v1.6/GRCh38/annotationsGRCh38_v1.6.tar.gz	TRUE
minDistTSE	Distance to closest Transcribed Sequence End (TSE).	https://krishna.gs.washington.edu/download/CADD/v1.6/GRCh38/annotationsGRCh38_v1.6.tar.gz	TRUE
priPhCons	Primate PhastCons conservation score (excl. human).	https://krishna.gs.washington.edu/download/CADD/v1.6/GRCh38/annotationsGRCh38_v1.6.tar.gz	TRUE
mamPhCons	Mammalian PhastCons conservation score (excl. human).	https://krishna.gs.washington.edu/download/CADD/v1.6/GRCh38/annotationsGRCh38_v1.6.tar.gz	TRUE
verPhCons	Vertebrate PhastCons conservation score (excl. human).	https://krishna.gs.washington.edu/download/CADD/v1.6/GRCh38/annotationsGRCh38_v1.6.tar.gz	TRUE
priPhyloP	Primate PhyloP score (excl. human).	https://krishna.gs.washington.edu/download/CADD/v1.6/GRCh38/annotationsGRCh38_v1.6.tar.gz	TRUE
mamPhyloP	Mammalian PhyloP score (excl. human).	https://krishna.gs.washington.edu/download/CADD/v1.6/GRCh38/annotationsGRCh38_v1.6.tar.gz	TRUE
verPhyloP	Vertebrate PhyloP score (excl. human).	https://krishna.gs.washington.edu/download/CADD/v1.6/GRCh38/annotationsGRCh38_v1.6.tar.gz	TRUE
bStatistic	Background selection score.	https://krishna.gs.washington.edu/download/CADD/v1.6/GRCh38/annotationsGRCh38_v1.6.tar.gz	TRUE
targetScan	targetscan.	https://krishna.gs.washington.edu/download/CADD/v1.6/GRCh38/annotationsGRCh38_v1.6.tar.gz	TRUE
mirSVR-Score	mirSVR-Score.	https://krishna.gs.washington.edu/download/CADD/v1.6/GRCh38/annotationsGRCh38_v1.6.tar.gz	TRUE
mirSVR-E	mirSVR-E.	https://krishna.gs.washington.edu/download/CADD/v1.6/GRCh38/annotationsGRCh38_v1.6.tar.gz	TRUE
mirSVR-Aln	mirSVR-Aln.	https://krishna.gs.washington.edu/download/CADD/v1.6/GRCh38/annotationsGRCh38_v1.6.tar.gz	TRUE
cHmm_E1	Number of 48 cell types in chromHMM state E1.	https://krishna.gs.washington.edu/download/CADD/v1.6/GRCh38/annotationsGRCh38_v1.6.tar.gz	TRUE
cHmm_E2	Number of 48 cell types in chromHMM state E2.	https://krishna.gs.washington.edu/download/CADD/v1.6/GRCh38/annotationsGRCh38_v1.6.tar.gz	TRUE
cHmm_E3	Number of 48 cell types in chromHMM state E3.	https://krishna.gs.washington.edu/download/CADD/v1.6/GRCh38/annotationsGRCh38_v1.6.tar.gz	TRUE
cHmm_E4	Number of 48 cell types in chromHMM state E4.	https://krishna.gs.washington.edu/download/CADD/v1.6/GRCh38/annotationsGRCh38_v1.6.tar.gz	TRUE
cHmm_E5	Number of 48 cell types in chromHMM state E5.	https://krishna.gs.washington.edu/download/CADD/v1.6/GRCh38/annotationsGRCh38_v1.6.tar.gz	TRUE
cHmm_E6	Number of 48 cell types in chromHMM state E6.	https://krishna.gs.washington.edu/download/CADD/v1.6/GRCh38/annotationsGRCh38_v1.6.tar.gz	TRUE
cHmm_E7	Number of 48 cell types in chromHMM state E7.	https://krishna.gs.washington.edu/download/CADD/v1.6/GRCh38/annotationsGRCh38_v1.6.tar.gz	TRUE
cHmm_E8	Number of 48 cell types in chromHMM state E8.	https://krishna.gs.washington.edu/download/CADD/v1.6/GRCh38/annotationsGRCh38_v1.6.tar.gz	TRUE
cHmm_E9	Number of 48 cell types in chromHMM state E9.	https://krishna.gs.washington.edu/download/CADD/v1.6/GRCh38/annotationsGRCh38_v1.6.tar.gz	TRUE
cHmm_E10	Number of 48 cell types in chromHMM state E10.	https://krishna.gs.washington.edu/download/CADD/v1.6/GRCh38/annotationsGRCh38_v1.6.tar.gz	TRUE
cHmm_E11	Number of 48 cell types in chromHMM state E11.	https://krishna.gs.washington.edu/download/CADD/v1.6/GRCh38/annotationsGRCh38_v1.6.tar.gz	TRUE
cHmm_E12	Number of 48 cell types in chromHMM state E12.	https://krishna.gs.washington.edu/download/CADD/v1.6/GRCh38/annotationsGRCh38_v1.6.tar.gz	TRUE
cHmm_E13	Number of 48 cell types in chromHMM state E13.	https://krishna.gs.washington.edu/download/CADD/v1.6/GRCh38/annotationsGRCh38_v1.6.tar.gz	TRUE
cHmm_E14	Number of 48 cell types in chromHMM state E14.	https://krishna.gs.washington.edu/download/CADD/v1.6/GRCh38/annotationsGRCh38_v1.6.tar.gz	TRUE
cHmm_E15	Number of 48 cell types in chromHMM state E15.	https://krishna.gs.washington.edu/download/CADD/v1.6/GRCh38/annotationsGRCh38_v1.6.tar.gz	TRUE
cHmm_E16	Number of 48 cell types in chromHMM state E16.	https://krishna.gs.washington.edu/download/CADD/v1.6/GRCh38/annotationsGRCh38_v1.6.tar.gz	TRUE
cHmm_E17	Number of 48 cell types in chromHMM state E17.	https://krishna.gs.washington.edu/download/CADD/v1.6/GRCh38/annotationsGRCh38_v1.6.tar.gz	TRUE
cHmm_E18	Number of 48 cell types in chromHMM state E18.	https://krishna.gs.washington.edu/download/CADD/v1.6/GRCh38/annotationsGRCh38_v1.6.tar.gz	TRUE
cHmm_E19	Number of 48 cell types in chromHMM state E19.	https://krishna.gs.washington.edu/download/CADD/v1.6/GRCh38/annotationsGRCh38_v1.6.tar.gz	TRUE
cHmm_E20	Number of 48 cell types in chromHMM state E20.	https://krishna.gs.washington.edu/download/CADD/v1.6/GRCh38/annotationsGRCh38_v1.6.tar.gz	TRUE
cHmm_E21	Number of 48 cell types in chromHMM state E21.	https://krishna.gs.washington.edu/download/CADD/v1.6/GRCh38/annotationsGRCh38_v1.6.tar.gz	TRUE
cHmm_E22	Number of 48 cell types in chromHMM state E22.	https://krishna.gs.washington.edu/download/CADD/v1.6/GRCh38/annotationsGRCh38_v1.6.tar.gz	TRUE
cHmm_E23	Number of 48 cell types in chromHMM state E23.	https://krishna.gs.washington.edu/download/CADD/v1.6/GRCh38/annotationsGRCh38_v1.6.tar.gz	TRUE
cHmm_E24	Number of 48 cell types in chromHMM state E24.	https://krishna.gs.washington.edu/download/CADD/v1.6/GRCh38/annotationsGRCh38_v1.6.tar.gz	TRUE
cHmm_E25	Number of 48 cell types in chromHMM state E25.	https://krishna.gs.washington.edu/download/CADD/v1.6/GRCh38/annotationsGRCh38_v1.6.tar.gz	TRUE
GerpRS	GERP++ RS score.	https://krishna.gs.washington.edu/download/CADD/v1.6/GRCh38/annotationsGRCh38_v1.6.tar.gz	TRUE
GerpRSpval	GERP++ RS score p-value.	https://krishna.gs.washington.edu/download/CADD/v1.6/GRCh38/annotationsGRCh38_v1.6.tar.gz	TRUE
GerpN	GERP++ N score.	https://krishna.gs.washington.edu/download/CADD/v1.6/GRCh38/annotationsGRCh38_v1.6.tar.gz	TRUE
GerpS	GERP++ S score.	https://krishna.gs.washington.edu/download/CADD/v1.6/GRCh38/annotationsGRCh38_v1.6.tar.gz	TRUE
tOverlapMotifs	Number of overlapping predicted TF motifs.	https://krishna.gs.washington.edu/download/CADD/v1.6/GRCh38/annotationsGRCh38_v1.6.tar.gz	TRUE
motifDist	Reference minus alternate allele difference in nucleotide frequency within an predicted overlapping motif.	https://krishna.gs.washington.edu/download/CADD/v1.6/GRCh38/annotationsGRCh38_v1.6.tar.gz	TRUE
EncodeH3K4me1-sum	Sum of Encode H3K4me1 levels (from 13 cell lines).	https://krishna.gs.washington.edu/download/CADD/v1.6/GRCh38/annotationsGRCh38_v1.6.tar.gz	FALSE
EncodeH3K4me1-max	Maximum of Encode H3K4me1 levels (from 13 cell lines).	https://krishna.gs.washington.edu/download/CADD/v1.6/GRCh38/annotationsGRCh38_v1.6.tar.gz	FALSE
EncodeH3K4me2-sum	Sum of Encode H3K4me2 levels (from 14 cell lines).	https://krishna.gs.washington.edu/download/CADD/v1.6/GRCh38/annotationsGRCh38_v1.6.tar.gz	FALSE
EncodeH3K4me2-max	Maximum of Encode H3K4me2 levels (from 14 cell lines).	https://krishna.gs.washington.edu/download/CADD/v1.6/GRCh38/annotationsGRCh38_v1.6.tar.gz	FALSE
EncodeH3K4me3-sum	Sum of Encode H3K4me3 levels (from 14 cell lines).	https://krishna.gs.washington.edu/download/CADD/v1.6/GRCh38/annotationsGRCh38_v1.6.tar.gz	FALSE
EncodeH3K4me3-max	Maximum of Encode H3K4me3 levels (from 14 cell lines).	https://krishna.gs.washington.edu/download/CADD/v1.6/GRCh38/annotationsGRCh38_v1.6.tar.gz	FALSE
EncodeH3K9ac-sum	Sum of Encode H3K9ac levels (from 13 cell lines).	https://krishna.gs.washington.edu/download/CADD/v1.6/GRCh38/annotationsGRCh38_v1.6.tar.gz	FALSE
EncodeH3K9ac-max	Maximum of Encode H3K9ac levels (from 13 cell lines).	https://krishna.gs.washington.edu/download/CADD/v1.6/GRCh38/annotationsGRCh38_v1.6.tar.gz	FALSE
EncodeH3K9me3-sum	Sum of Encode H3K9me3 levels (from 14 cell lines).	https://krishna.gs.washington.edu/download/CADD/v1.6/GRCh38/annotationsGRCh38_v1.6.tar.gz	FALSE
EncodeH3K9me3-max	Maximum of Encode H3K9me3 levels (from 14 cell lines).	https://krishna.gs.washington.edu/download/CADD/v1.6/GRCh38/annotationsGRCh38_v1.6.tar.gz	FALSE
EncodeH3K27ac-sum	Sum of Encode H3K27ac levels (from 14 cell lines).	https://krishna.gs.washington.edu/download/CADD/v1.6/GRCh38/annotationsGRCh38_v1.6.tar.gz	FALSE
EncodeH3K27ac-max	Maximum of Encode H3K27ac levels (from 14 cell lines).	https://krishna.gs.washington.edu/download/CADD/v1.6/GRCh38/annotationsGRCh38_v1.6.tar.gz	FALSE
EncodeH3K27me3-sum	Sum of Encode H3K27me3 levels (from 14 cell lines).	https://krishna.gs.washington.edu/download/CADD/v1.6/GRCh38/annotationsGRCh38_v1.6.tar.gz	FALSE
EncodeH3K27me3-max	Maximum of Encode H3K27me3 levels (from 14 cell lines).	https://krishna.gs.washington.edu/download/CADD/v1.6/GRCh38/annotationsGRCh38_v1.6.tar.gz	FALSE
EncodeH3K36me3-sum	Sum of Encode H3K36me3 levels (from 10 cell lines).	https://krishna.gs.washington.edu/download/CADD/v1.6/GRCh38/annotationsGRCh38_v1.6.tar.gz	FALSE
EncodeH3K36me3-max	Maximum of Encode H3K36me3 levels (from 10 cell lines).	https://krishna.gs.washington.edu/download/CADD/v1.6/GRCh38/annotationsGRCh38_v1.6.tar.gz	FALSE
EncodeH3K79me2-sum	Sum of Encode H3K79me2 levels (from 13 cell lines).	https://krishna.gs.washington.edu/download/CADD/v1.6/GRCh38/annotationsGRCh38_v1.6.tar.gz	FALSE
EncodeH3K79me2-max	Maximum of Encode H3K79me2 levels (from 13 cell lines).	https://krishna.gs.washington.edu/download/CADD/v1.6/GRCh38/annotationsGRCh38_v1.6.tar.gz	FALSE
EncodeH4K20me1-sum	Sum of Encode H4K20me1 levels (from 11 cell lines).	https://krishna.gs.washington.edu/download/CADD/v1.6/GRCh38/annotationsGRCh38_v1.6.tar.gz	FALSE
EncodeH4K20me1-max	Maximum of Encode H4K20me1 levels (from 11 cell lines).	https://krishna.gs.washington.edu/download/CADD/v1.6/GRCh38/annotationsGRCh38_v1.6.tar.gz	FALSE
EncodeH2AFZ-sum	Sum of Encode H2AFZ levels (from 13 cell lines).	https://krishna.gs.washington.edu/download/CADD/v1.6/GRCh38/annotationsGRCh38_v1.6.tar.gz	FALSE
EncodeH2AFZ-max	Maximum of Encode H2AFZ levels (from 13 cell lines).	https://krishna.gs.washington.edu/download/CADD/v1.6/GRCh38/annotationsGRCh38_v1.6.tar.gz	FALSE
EncodeDNase-sum	Sum of Encode Dnase-seq levels (from 12 cell lines).	https://krishna.gs.washington.edu/download/CADD/v1.6/GRCh38/annotationsGRCh38_v1.6.tar.gz	FALSE
EncodeDNase-max	Maximum of Encode Dnase-seq levels (from 12 cell lines).	https://krishna.gs.washington.edu/download/CADD/v1.6/GRCh38/annotationsGRCh38_v1.6.tar.gz	FALSE
EncodetotalRNA-sum	Sum of Encode totalRNA-seq levels (from 10 cell lines always minus and plus strand).	https://krishna.gs.washington.edu/download/CADD/v1.6/GRCh38/annotationsGRCh38_v1.6.tar.gz	FALSE
EncodetotalRNA-max	Maximum of Encode totalRNA-seq levels (from 10 cell lines always minus and plus strand).	https://krishna.gs.washington.edu/download/CADD/v1.6/GRCh38/annotationsGRCh38_v1.6.tar.gz	FALSE
Grantham_x	The Grantham distance from reference to mutation amino acid residue.	https://krishna.gs.washington.edu/download/CADD/v1.6/GRCh38/annotationsGRCh38_v1.6.tar.gz	TRUE
SpliceAI-acc-gain	Masked SpliceAI acceptor gain score.	https://krishna.gs.washington.edu/download/CADD/v1.6/GRCh38/annotationsGRCh38_v1.6.tar.gz	TRUE
SpliceAI-acc-loss	Masked SpliceAI acceptor loss score.	https://krishna.gs.washington.edu/download/CADD/v1.6/GRCh38/annotationsGRCh38_v1.6.tar.gz	TRUE
SpliceAI-don-gain	Masked SpliceAI donor gain score.	https://krishna.gs.washington.edu/download/CADD/v1.6/GRCh38/annotationsGRCh38_v1.6.tar.gz	TRUE
SpliceAI-don-loss	Masked SpliceAI donor loss score.	https://krishna.gs.washington.edu/download/CADD/v1.6/GRCh38/annotationsGRCh38_v1.6.tar.gz	TRUE
MMSp_acceptorIntron	MMSplice acceptor intron (intron 3’) score.	https://krishna.gs.washington.edu/download/CADD/v1.6/GRCh38/annotationsGRCh38_v1.6.tar.gz	TRUE
MMSp_acceptor	MMSplice acceptor score.	https://krishna.gs.washington.edu/download/CADD/v1.6/GRCh38/annotationsGRCh38_v1.6.tar.gz	TRUE
MMSp_exon	MMSplice exon score.	https://krishna.gs.washington.edu/download/CADD/v1.6/GRCh38/annotationsGRCh38_v1.6.tar.gz	TRUE
MMSp_donor	MMSplice donor score.	https://krishna.gs.washington.edu/download/CADD/v1.6/GRCh38/annotationsGRCh38_v1.6.tar.gz	TRUE
MMSp_donorIntron	MMSplice donor intron.	https://krishna.gs.washington.edu/download/CADD/v1.6/GRCh38/annotationsGRCh38_v1.6.tar.gz	TRUE
Dist2Mutation	Distance between the closest BRAVO SNV up and downstream (position itself excluded).	https://krishna.gs.washington.edu/download/CADD/v1.6/GRCh38/annotationsGRCh38_v1.6.tar.gz	TRUE
Freq100bp	Number of frequent (MAF > 0.05) BRAVO SNV in 100 bp window nearby.	https://krishna.gs.washington.edu/download/CADD/v1.6/GRCh38/annotationsGRCh38_v1.6.tar.gz	TRUE
Rare100bp	Number of rare (MAF < 0.05) BRAVO SNV in 100 bp window nearby.	https://krishna.gs.washington.edu/download/CADD/v1.6/GRCh38/annotationsGRCh38_v1.6.tar.gz	TRUE
Sngl100bp	Number of single occurrence BRAVO SNV in 100 bp window nearby.	https://krishna.gs.washington.edu/download/CADD/v1.6/GRCh38/annotationsGRCh38_v1.6.tar.gz	TRUE
Freq1000bp	Number of frequent (MAF > 0.05) BRAVO SNV in 1000 bp window nearby.	https://krishna.gs.washington.edu/download/CADD/v1.6/GRCh38/annotationsGRCh38_v1.6.tar.gz	TRUE
Rare1000bp	Number of rare (MAF < 0.05) BRAVO SNV in 1000 bp window nearby.	https://krishna.gs.washington.edu/download/CADD/v1.6/GRCh38/annotationsGRCh38_v1.6.tar.gz	TRUE
Sngl1000bp	Number of single occurence BRAVO SNV in 1000 bp window nearby.	https://krishna.gs.washington.edu/download/CADD/v1.6/GRCh38/annotationsGRCh38_v1.6.tar.gz	TRUE
Freq10000bp	Number of frequent (MAF > 0.05) BRAVO SNV in 10000 bp window nearby.	https://krishna.gs.washington.edu/download/CADD/v1.6/GRCh38/annotationsGRCh38_v1.6.tar.gz	TRUE
Rare10000bp	Number of rare (MAF < 0.05) BRAVO SNV in 10000 bp window nearby.	https://krishna.gs.washington.edu/download/CADD/v1.6/GRCh38/annotationsGRCh38_v1.6.tar.gz	TRUE
Sngl10000bp	Number of single occurence BRAVO SNV in 10000 bp window nearby.	https://krishna.gs.washington.edu/download/CADD/v1.6/GRCh38/annotationsGRCh38_v1.6.tar.gz	TRUE
EnsembleRegulatoryFeature	Matches in the Ensemble Regulatory Built (similar to annotype).	https://krishna.gs.washington.edu/download/CADD/v1.6/GRCh38/annotationsGRCh38_v1.6.tar.gz	TRUE
dbscSNV-ada_score	dbscSNV adaboost meta-predictor for spice-altering variants.	https://krishna.gs.washington.edu/download/CADD/v1.6/GRCh38/annotationsGRCh38_v1.6.tar.gz	TRUE
dbscSNV-rf_score	dbscSNV randomforest meta-predictor for spice-altering variants.	https://krishna.gs.washington.edu/download/CADD/v1.6/GRCh38/annotationsGRCh38_v1.6.tar.gz	TRUE
RemapOverlapTF	Remap number of different transcription factors binding.	https://krishna.gs.washington.edu/download/CADD/v1.6/GRCh38/annotationsGRCh38_v1.6.tar.gz	TRUE
RemapOverlapCL	Remap number of different transcription factor - cell line combinations binding.	https://krishna.gs.washington.edu/download/CADD/v1.6/GRCh38/annotationsGRCh38_v1.6.tar.gz	TRUE
Charge	The change in formal charge resulting from replacing the reference amino acid residue with the mutation. Histidine is assumed protonated (formal charge of +1).	http://karchinlab.org/chasmdl/SNVBox.3.0.sql.gz	TRUE
Volume	The change in residue volume resulting from the replacement (in units of cubic Angstroms).	http://karchinlab.org/chasmdl/SNVBox.3.0.sql.gz	TRUE
Hydrophobicity	The change in hydrophobicity resulting from the substitution.	http://karchinlab.org/chasmdl/SNVBox.3.0.sql.gz	TRUE
Polarity	Polarity change from reference to mutation amino acid residue.	http://karchinlab.org/chasmdl/SNVBox.3.0.sql.gz	TRUE
Ex	Amino acid substitution score from the EX matrix.	http://karchinlab.org/chasmdl/SNVBox.3.0.sql.gz	TRUE
PAM250	Amino acid substitution score from the PAM250 matrix.	http://karchinlab.org/chasmdl/SNVBox.3.0.sql.gz	TRUE
JM	Amino acid substitution score from the Miyazawa-Jernigan contact energy matrix.	http://karchinlab.org/chasmdl/SNVBox.3.0.sql.gz	TRUE
HGMD2003	Number of times that the reference to mutation substitution occurs in the Human Gene Mutation Database, 2003 version.	http://karchinlab.org/chasmdl/SNVBox.3.0.sql.gz	TRUE
VB	Amino acid substitution score from the VB matrix.	http://karchinlab.org/chasmdl/SNVBox.3.0.sql.gz	TRUE
Transition	Frequency of transition between two neighboring amino acids based on all human proteins in SwissProt/TrEMBL.	http://karchinlab.org/chasmdl/SNVBox.3.0.sql.gz	TRUE
COSMIC	Ln(frequency) of missense change type in COSMIC (release 38).	http://karchinlab.org/chasmdl/SNVBox.3.0.sql.gz	TRUE
COSMICvsSWISSPROT	Ln(frequency) of missense change in COSMIC (release 38) normalized by the frequency of reference amino acid residue in human proteins in SwissProt/TrEMBL.	http://karchinlab.org/chasmdl/SNVBox.3.0.sql.gz	TRUE
HAPMAP	Ln(frequency) of missense change type in HapMap validated SNPs in dbSNP Build 129.	http://karchinlab.org/chasmdl/SNVBox.3.0.sql.gz	TRUE
COSMICvsHAPMAP	Ln(frequency) of missense change in COSMIC (release 38) normalized by the number of times the change type was observed in HapMap validated SNPs in dbSNP Build 129.	http://karchinlab.org/chasmdl/SNVBox.3.0.sql.gz	TRUE
MOD_RES	Uniprot modified residue.	https://www.uniprot.org/	TRUE
REGION	Uniprot region.	https://www.uniprot.org/	TRUE
REGION_DESCRIPTION	Uniprot region description.	https://www.uniprot.org/	TRUE
INTERACTION_REGION	Uniprot interaction region.	https://www.uniprot.org/	TRUE
REQUIRED_FOR_INTER	Uniprot region required for interaction.	https://www.uniprot.org/	TRUE
ATP_binding_gbind	GraphBind ligand score.	https://academic.oup.com/nar/article/49/9/e51/6134185	TRUE
Ca2+_binding_gbind	GraphBind ligand score.	https://academic.oup.com/nar/article/49/9/e51/6134186	TRUE
DNA_binding_gbind	GraphBind ligand score.	https://academic.oup.com/nar/article/49/9/e51/6134187	TRUE
HEME_binding_gbind	GraphBind ligand score.	https://academic.oup.com/nar/article/49/9/e51/6134188	TRUE
Mg2+_binding_gbind	GraphBind ligand score.	https://academic.oup.com/nar/article/49/9/e51/6134189	TRUE
Mn2+_binding_gbind	GraphBind ligand score.	https://academic.oup.com/nar/article/49/9/e51/6134190	TRUE
RNA_binding_gbind	GraphBind ligand score.	https://academic.oup.com/nar/article/49/9/e51/6134191	TRUE
IMPACT	The VEP impact modifier for the consequence type.	https://useast.ensembl.org/info/docs/tools/vep/index.html	TRUE
