# Supplementary material for: Learning sequence to predict gain- or loss-of-function variants
Source: Research Square preprint supplement (doi:10.21203/rs.3.rs-6705195/v1), 2025-06-06
Supplement: Supplementary file 4 [file cc845f005aa8432ea327077c.xlsx]

## Sheet: Supplementary Table 2
DMS_id	r2_score	kendall_tau	pearson_corr	spearman_corr	spearman_p_value
A4_HUMAN_Seuma_2022	0.701009	0.608839	0.864664	0.796943	5.2063e-32
ACE2_HUMAN_Chan_2020	0.493628	0.501225	0.704611	0.666987	1.36875e-58
ADRB2_HUMAN_Jones_2020	0.165787	0.368806	0.450003	0.539087	2.57393e-118
AICDA_HUMAN_Gajula_2014_3cycles	0.305696	0.21636	0.615012	0.325267	0.0355632
AMFR_HUMAN_Tsuboyama_2023_4G3O	0.839804	0.740447	0.919001	0.909902	9.97416e-61
B2L11_HUMAN_Dutta_2010_binding-Mcl-1	0.774504	0.750446	0.883944	0.919633	1.55871e-14
BRCA1_HUMAN_Findlay_2018	0.298035	0.325495	0.551471	0.470951	1.03064e-21
CALM1_HUMAN_Weile_2017	0.0920289	0.228498	0.316604	0.334846	5.84565e-11
CAR11_HUMAN_Meitlis_2020_gof	0.252077	0.39889	0.518613	0.566061	1.36051e-41
CAR11_HUMAN_Meitlis_2020_lof	0.557188	0.569937	0.754785	0.768977	9.75611e-95
CASP3_HUMAN_Roychowdhury_2020	0.375623	0.446654	0.623335	0.637306	3.47307e-37
CASP7_HUMAN_Roychowdhury_2020	0.223127	0.358849	0.506545	0.518809	1.51131e-24
CBPA2_HUMAN_Tsuboyama_2023_1O6X	0.916763	0.783477	0.958511	0.933202	4.99623e-126
CBS_HUMAN_Sun_2020	0.0844436	0.24729	0.354548	0.352665	1.53194e-43
CBX4_HUMAN_Tsuboyama_2023_2K28	0.822718	0.718454	0.907769	0.896013	8.69788e-67
CCR5_HUMAN_Gill_2023	0.19358	0.331744	0.478785	0.473808	9.91902e-70
CD19_HUMAN_Klesmith_2019_FMC_singles	0.444742	0.420014	0.673725	0.577081	4.52097e-68
CP2C9_HUMAN_Amorosi_2021_abundance	0.675134	0.580851	0.823891	0.775751	1.35332e-256
CP2C9_HUMAN_Amorosi_2021_activity	0.717627	0.66083	0.850225	0.84408	0
DNJA1_HUMAN_Tsuboyama_2023_2LO1	0.909044	0.780986	0.954088	0.921537	3.14277e-102
EPHB2_HUMAN_Tsuboyama_2023_1F0M	0.889939	0.721693	0.944192	0.886785	2.00302e-84
ERBB2_HUMAN_Elazar_2016	0.849246	0.586946	0.926031	0.757353	1.85255e-13
FKBP3_HUMAN_Tsuboyama_2023_2KFV	0.819129	0.722737	0.905621	0.889203	1.64374e-85
GDIA_HUMAN_Silverstein_2021	0.0732564	0.153339	0.294879	0.231889	0.000379624
GLPA_HUMAN_Elazar_2016	0.792323	0.709184	0.893012	0.88051	7.56949e-17
HECD1_HUMAN_Tsuboyama_2023_3DKM	0.868968	0.794485	0.933156	0.936286	2.04288e-117
HEM3_HUMAN_Loggerenberg_2023	0.196241	0.304937	0.457354	0.441177	2.14345e-55
HMDH_HUMAN_Jiang_2019	0.446194	0.456453	0.67302	0.636675	0
HXK4_HUMAN_Gersing_2022_activity	0.340668	0.423636	0.59517	0.599461	9.37976e-168
HXK4_HUMAN_Gersing_2023_abundance	0.373698	0.373001	0.612967	0.532174	1.72565e-123
ILF3_HUMAN_Tsuboyama_2023_2L33	0.904357	0.683927	0.954013	0.844573	1.39047e-73
KCNE1_HUMAN_Muhammad_2023_expression	0.754504	0.647688	0.870752	0.804803	1.22949e-107
KCNE1_HUMAN_Muhammad_2023_function	0.778958	0.598347	0.883907	0.789811	6.38963e-100
KCNH2_HUMAN_Kozek_2020	0.417574	0.479487	0.68322	0.638086	9.45308e-06
LYAM1_HUMAN_Elazar_2016	0.61273	0.596752	0.794624	0.793803	9.04951e-17
MET_HUMAN_Estevam_2023	0.452249	0.407673	0.693833	0.602191	1.85736e-107
MK01_HUMAN_Brenan_2016	0.142556	0.311472	0.417498	0.445973	1.56512e-67
MSH2_HUMAN_Jia_2020	0.478841	0.424135	0.703515	0.586525	0
MTHR_HUMAN_Weile_2021	0.53839	0.478849	0.736933	0.665053	3.361583e-318
NKX31_HUMAN_Tsuboyama_2023_2L9R	0.846072	0.711948	0.922374	0.885091	2.38726e-79
NPC1_HUMAN_Erwood_2022_HEK293T	0.283262	0.338337	0.53442	0.496898	2.43358e-09
NPC1_HUMAN_Erwood_2022_RPE1	0.70318	0.538462	0.839506	0.714286	0.00608831
NUD15_HUMAN_Suiter_2020	0.655667	0.59421	0.814787	0.796752	3.94645e-126
OBSCN_HUMAN_Tsuboyama_2023_1V1C	0.888698	0.790794	0.946838	0.936784	6.39057e-117
OPSD_HUMAN_Wan_2019	0.32239	0.375	0.56828	0.519051	0.00196754
OTC_HUMAN_Lo_2023	0.451376	0.499175	0.685165	0.685145	7.54941e-45
OTU7A_HUMAN_Tsuboyama_2023_2L2D	0.772332	0.727784	0.881995	0.906437	1.26567e-48
P53_HUMAN_Giacomelli_2018_Null_Etoposide	0.595263	0.525473	0.777193	0.711255	1.14544e-230
P53_HUMAN_Giacomelli_2018_Null_Nutlin	0.450169	0.48614	0.677135	0.664087	1.13452e-190
P53_HUMAN_Giacomelli_2018_WT_Nutlin	0.705189	0.654575	0.841431	0.845667	0
P53_HUMAN_Kotler_2018	0.442474	0.454819	0.679107	0.647465	2.43391e-26
PAI1_HUMAN_Huttinger_2021	0.187276	0.319285	0.47678	0.461816	1.3923e-57
PIN1_HUMAN_Tsuboyama_2023_1I6C	0.822797	0.746012	0.907229	0.912257	5.86148e-55
PITX2_HUMAN_Tsuboyama_2023_2L7M	0.854751	0.769695	0.924661	0.922581	1.03131e-74
PKN1_HUMAN_Tsuboyama_2023_1URF	0.868239	0.70616	0.93352	0.865664	8.52445e-80
PPARG_HUMAN_Majithia_2016	0.884731	0.782731	0.940624	0.938576	0
PPM1D_HUMAN_Miller_2022	0.334788	0.425788	0.587444	0.615695	2.66178e-165
PR40A_HUMAN_Tsuboyama_2023_1UZC	0.857669	0.765921	0.926117	0.923731	4.45156e-99
PRKN_HUMAN_Clausen_2023	0.80047	0.684489	0.89565	0.850978	0
PTEN_HUMAN_Matreyek_2021	0.399894	0.468461	0.645052	0.648092	3.28974e-122
PTEN_HUMAN_Mighell_2018	0.561468	0.39487	0.751906	0.557278	3.05328e-119
Q53Z42_HUMAN_McShan_2019_binding-TAPBPR	0.595006	0.559008	0.775564	0.755329	1.57391e-124
Q53Z42_HUMAN_McShan_2019_expression	0.460166	0.517989	0.694258	0.716113	3.01474e-106
RAF1_HUMAN_Zinkus-Boltz_2019	0.390379	0.419356	0.643392	0.566257	2.4094e-06
RASH_HUMAN_Bandaru_2017	0.693292	0.66602	0.832821	0.84634	3.96975e-173
RASK_HUMAN_Weng_2022_abundance	0.764204	0.680612	0.876007	0.852283	2.19606e-174
RASK_HUMAN_Weng_2022_binding-DARPin_K55	0.942933	0.784686	0.971356	0.930931	1.52339e-265
RBP1_HUMAN_Tsuboyama_2023_2KWH	0.867936	0.759645	0.932552	0.912397	6.46823e-80
RD23A_HUMAN_Tsuboyama_2023_1IFY	0.907158	0.764282	0.953561	0.912928	3.66857e-64
S22A1_HUMAN_Yee_2023_abundance	0.632902	0.556403	0.800169	0.7535	0
S22A1_HUMAN_Yee_2023_activity	0.641299	0.55213	0.805788	0.751176	0
SC6A4_HUMAN_Young_2021	0.376822	0.47591	0.635634	0.673067	1.67751e-305
SCN5A_HUMAN_Glazer_2019	0.00126236	0.0545455	0.200516	0.0675889	0.659107
SERC_HUMAN_Xie_2023	0.109105	0.211898	0.382351	0.312933	3.79638e-10
SHOC2_HUMAN_Kwon_2022	0.312806	0.385698	0.565806	0.55252	1.08226e-175
SOX30_HUMAN_Tsuboyama_2023_7JJK	0.836723	0.702872	0.915095	0.873284	2.25212e-64
SRBS1_HUMAN_Tsuboyama_2023_2O2W	0.844376	0.752492	0.919713	0.909192	1.9268e-94
SRC_HUMAN_Ahler_2019	0.603651	0.593063	0.77748	0.780547	1.85228e-139
SRC_HUMAN_Chakraborty_2023_binding-DAS_25uM	0.494047	0.545951	0.706761	0.736426	2.43638e-125
SRC_HUMAN_Nguyen_2022	0.433279	0.499491	0.676935	0.692215	2.87889e-97
SUMO1_HUMAN_Weile_2017	0.360817	0.42988	0.612782	0.614649	1.05041e-36
SYUA_HUMAN_Newberry_2020	0.821353	0.472337	0.908208	0.628517	2.5387e-56
TADBP_HUMAN_Bolognesi_2019	0.673497	0.587169	0.821708	0.755581	1.28157e-45
TNKS2_HUMAN_Tsuboyama_2023_5JRT	0.863899	0.746845	0.929806	0.912475	8.55739e-93
TPK1_HUMAN_Weile_2017	0.0295465	0.136321	0.172023	0.202653	2.49193e-07
TPMT_HUMAN_Matreyek_2018	0.435473	0.402211	0.661119	0.564826	9.47314e-63
TPOR_HUMAN_Bridgford_2020	0.465696	0.477876	0.702061	0.662112	1.40002e-15
UBC9_HUMAN_Weile_2017	0.442832	0.494563	0.692923	0.6879	3.8753e-73
UBE4B_HUMAN_Tsuboyama_2023_3L1X	0.780178	0.712574	0.88545	0.887609	4.85729e-78
UBR5_HUMAN_Tsuboyama_2023_1I2T	0.883579	0.736229	0.94019	0.900539	2.39773e-83
VKOR1_HUMAN_Chiasson_2020_abundance	0.727192	0.626666	0.85327	0.811873	1.33092e-127
VKOR1_HUMAN_Chiasson_2020_activity	0.186928	0.256553	0.449836	0.377786	4.19147e-06
